# Supplementary material for: Addressing the difficulties in quantifying the Twomey effect for marine warm clouds from multi-sensor satellite observations and reanalysis
Source: Copernicus journal article supplement (doi:10.5194/acp-2021-999), 2022-01-07
Supplement: Supplementary file [file acp-2021-999-AC2-supplement.pdf]

# Response to the Reviewer's Comments

March 15, 2022

We would like to thank the reviewer for the effort in helping us improve the manuscript. Below we respond point-by-point to the comments, with the reviewer comments in black, and our responses in blue. The manuscript has been revised accordingly. The line numbers in the response are for the revised version with tracked changes.

## Comments by Reviewer #2

The article studies the effect of aerosols on liquid cloud droplet concentration using several space-based instruments (active and passive) to describe cloud and aerosol properties and reanalysis to retrieve information on sulfate. The authors investigate the potential biases that are usually overlooked by most of the studies quantifying this effect. The considered biases are the updraft, precipitation, retrievals of AOD and droplet concentration by satellite observations, and vertical co-location of aerosols and clouds. The sensitivity of the cloud droplet number is retrieved and quantified considering different regimes constrained for the potential biases individually.

The paper addresses relevant scientific questions within the scope of ACP and presents ideas using pre-existing data and methods but used for new scientific questions which I find particularly interesting. It presents different conclusions on the potential biases when studying the aerosol impacts on liquid cloud properties. The results are interesting for the scientific community and the paper indicates the credit to related work and the motivation of their new contribution. The abstract reflects the contents of the paper.

However, I have some concerns that need to be addressed. I was hoping for an S value with and without constrains for all the biases to evaluate the impacts all together, it would help to motivate future studies. I think the method section needs more details: There are many datasets used and many constrains, but it is difficult to understand what is used for each section. Considering the lack of my understanding in the method, I cannot assess that the results are sufficient to support the conclusions and it would be difficult for fellow scientists to reproduce the study. Also, the study refers to the Twomey effect, but the authors are not looking at the changes in radiative properties. I find the term of Twomey effect in the title and through the text misleading. Most of the discussions are in the section "results" and not "discussion" and the "discussion" section is more an outlook, but otherwise the paper has a good structure. For all the different reasons mentioned above, I suggest major revisions before accepting the article for publication. I described below the different comments that I think are needed to improve the paper.

We thank the reviewer for the thorough assessment, and helpful comments and suggestions to improve the manuscript. We have revised the manuscript carefully according to the reviewer's comments. Please see the following detailed point-by-point responses.

## Major revisions

1. As suggested in my introduction, the study claims to deal with the Twomey effect, but the Twomey effect refers to the change in cloud radiative properties due to CCN. The change in cloud droplet number is one of the causes. The cloud droplet concentration can be linked to the Twomey effect only if the water content is maintained constant. I do not think the present study is constraining for water content therefore the change in cloud droplets cannot be related to the Twomey effect here. I understand that biases on S would impact the quantification on the Twomey effect but claiming that "the measure of the Twomey effect (S)" on line 378 is wrong. I suggest limiting the reference to the Twomey effect as a motivation and removing it from the title because it is not what the paper is quantifying.

We thank the reviewer for this important suggestion. For studies that look at the response of cloud effective radius to aerosol, the constraint on LWP is critical. The Nd calculation is, however, independent of LWP (at least in an ideal case), so does not need an explicit constraint to be related to the Twomey effect, which was well documented by McComiskey and Feingold (2012). We agree with the reviewer that the Twomey effect also includes the radiation response to changed aerosol (radiative forcing), but this radiative component is not estimated here as the anthropogenic perturbation to CCN concentrations is highly uncertain and not easily accessible from observational data. Instead, this study places the focus on the microphysical component of the Twomey effect (i.e.,  $S$ ), which is central to the overall calculation. We now make this clear on both abstract and introduction (lines 2-3 and lines 31-33). As such, we think it is still useful and meaningful to mention the Twomey effect as a motivation, but meanwhile we limit the cases where  $S$  is referred to as they Twomey effect throughout the main text as suggested by the reviewer.

2. I have several problems with the method in section 2:

- 1) There are a lot of datasets, but I am still confused about which dataset have been used for which part of the study. Maybe it is ok in the section, but I suggest to explicit the datasets used for each part of section 3 (as it is done for section 3.2 on lines 215-218).

Thank you for the suggestion. To address this problem more clearly, we now add Table 2 to summarize the combination of datasets used in each section.

- 2) Line 112: I do not understand how aerosol and cloud properties are collocated, since the aerosols are not retrieved if the pixel is cloudy. Can the authors explicit how they deal with that? The closest pixel is mentioned in one of the sections, but I do not know if this is the method for the entire study.

Since passive remote sensing only allows us to retrieve aerosol properties in clear pixels, in fact we cannot obtain strictly collocated aerosol/cloud retrievals at a cloud pixel scale (e.g., 1 km x 1 km). The only feasible way is to collect adjacent aerosol and cloud retrievals for analysis. Therefore, we use AOD on a coarse-resolved grid ( $1^\circ \times 1^\circ$  on a latitude-longitude grid) to match cloud pixels (1km x 1km), assuming that aerosols properties in adjacent clear areas are representative of those under cloudy conditions (Anderson et al., 2003; Quaas et al., 2008). We now make this clear in the method section on lines 137-140.

- 3) When MISR and Terra are used, I am guessing that A-train observations are not used, but I am not sure. Can the authors clarify?

Yes, MISR and MODIS/Terra are used in section 3.1, 3.3 and 3.4, and A-train observations are used in section 3.2, which has been clarified in Table 2.

- 4) Line 117: “the lowest 15%”, is this threshold based on Ma et al. (2018) or is it an ad-hoc choice? If the latter, the authors should specify why 15% is chosen. Also, the lowest 15% can be important as it represents a transient mode and potentially the highest impact of aerosols on cloud properties. Did the author study how it potentially impacts the results?

This threshold is proposed by Hasekamp et al. (2019) based on the finding by (Ma et al., 2018) that the large measurement uncertainties at low aerosol concentrations can lead to an underestimate of cloud susceptibility. (Hasekamp et al., 2019) further showed that leaving out the lowest 15% of data yields a higher  $N_d$ -to-AI slope compared to using all data, which is also found in our study. A statement on this is added to the revised manuscript (lines 144-146).

- 5) Line 151: about dividing the dataset into 20 bins of AI/AOD, considering the median, and doing the fit, I understand the idea but I think the dataset loses a lot of information doing that. Also, if the dataset is large enough, the outliers will be removed since most of the points are going to be around the correct value. A statistical test is better than considering the medians. The difference between the blue and white lines in the example (Figure 1) are very similar and does not convince me that the method chosen by the authors is better than considering every data point.

Thank you for the important comment. Actually, both approaches involve different degrees of averaging (or binning). For instance, even for the all-data approach, each data point ( $1^\circ$  by  $1^\circ$  grid) is a result of averaging from sub-grid observations. As the two approaches are the typical ones utilized by previous studies to investigate aerosol-cloud interactions (Quaas et al., 2008; Gryspeerdt et al., 2017; Hasekamp et al., 2019; Rosenfeld et al., 2019), it is of importance to know how large the difference in  $S$  estimates between the two could be. Therefore, we rephrase this paragraph to focus more on the difference (lines 201-203) rather than judging which approach is better, which is beyond the scope of this paper. We note that both approaches lead to similar conclusions, as such, we only focus on the results from pre-binned approach in the revised manuscript, meanwhile also put the results associated with all-data approach to Supplementary Materials. The 95 % confidence intervals of the regression slopes are now added for both approaches as suggested by the reviewer.

3. The authors are mentioning the uncertainties from space-based observations and how to reduce them (e.g., looking at certain solar zenithal angles...), but I doubt that the uncertainties are reduced to 0. However, remaining uncertainties are neither included in the results nor discussed by the authors. I think a discussion is missing about the uncertainties in the retrievals but also on the methods: The authors could have retrieved uncertainties on  $S$  with the 95% confidence interval on the fit considering the entire dataset (and not only the medians over the 20 bins) as it is done by many previous studies on the aerosol impacts on liquid clouds. Considering uncertainties on the fit would have been relevant when comparing the sensitivity values, for example in lines 222, the difference between 0.45 and 0.56 in  $S$  might not be statistically significant, I am not convinced by the comparison made if uncertainties are not provided.

Thank you for the important comment. We now calculate the 95% confidence intervals on the fits throughout the paper (see the response above), and also add a paragraph to discuss the remain uncertainty on  $N_d$  retrieval on lines 422-427.

4. I do not understand for which type of clouds the study is designed.

This study was not limited to a specific cloud type. All types including stratiform and cumuliform clouds were considered together in the original manuscript. In order to carefully apply CBH as a updraft proxy, we now constrain clouds to convective clouds but only for the CBH-related results (see more details in response below).

- 1) The CBH is used as a proxy for the updraft and seems to be designed for cumuliform clouds as stated in lines 55 and 169 but in the method section, I do not see any constrain for avoiding other type of clouds. Therefore, I am wondering if the proxy for the updraft is relevant in most of the observed pixels.

Thanks for this important comment. To ensure the applicability of CBH, we now restrict the analyses related to CBH to convective clouds only by adopting the threshold of  $LTS < 16K$  (Rosenfeld et al., 2019). A similar dependence, i.e., increasing  $S$  with CBH, is also seen even after constraining the cloud type (Fig. 2a in the revised manuscript). It is worth mentioning that, beyond the CBH, the CGT was used as an alternative proxy for the updraft regardless the cloud types, since it has been observed to be associated with the cloud-base updraft for shallow cumuliform clouds (Lareau et al., 2018) and also correlated with cloud-base updraft for stratiform clouds via modulating cloud top cooling (Zheng et al., 2016). Therefore, the conclusion of updraft-dependency holds for all cloud types. We now clarify these in the method section on lines 160-167, and the Figure 2a is revised accordingly.

- 2) There are some specifications referring to adiabatic situation (line 120 “adiabatic approximation”), to cumuliform clouds (line 55), or to convective clouds (line 169), but there is no constrain for parameters to limit the study to these situations. Therefore, I am not sure that the proxies used by the study are relevant. There is a threshold on considering single layered clouds (line 123), but I am not sure it is enough.

Thanks for the comment. In the revised version, we have already constrained clouds involved in the CBH-related analysis to convective ones (see response to specific point above). As for the adiabatic approximation, it was found that the filtering of cloud adiabaticity only has a negligible impact on the estimate of  $S$  since  $N_d$  is the independent variable in the  $S$  calculation, but in turn results in a reduction of up to 63 % in the data volume (Gryspeerdt et al., 2021). For this reason, we do not apply such filtering here. We now explain this more carefully in the revised text on lines 149-151.

- 3) Some results are associated to “stratus clouds” (line 177). I guess that there is no threshold on the type of considered clouds, but then I do not understand how to use linear correlation only applicable to convective clouds and the discussion is about effects from stratus clouds. The authors should clarify that.

The cloud type constraint has been applied (see more details in response above) as suggested by the reviewer. With respect to the discussion involved “stratus clouds”, we didn’t mean the comparison with previous studies for same cloud type, but wanted to say that the similar dependence on updraft was also observed in different cloud regimes (stratus and also altocumulus clouds) by surface remote sensing.

- 4) Another example on line 278, where the authors compare DELTANd and DELTANall, these values might be retrieved for different clouds, for open/closed cells, convective clouds, I do not understand how these two quantities can be compared without further consideration on the type of clouds. The differences in  $S$  can be explained by the biases, as suggested by the authors, but also by different cloud types, meteorology... The authors acknowledge it on line 410 “CF also covaries with cloud dynamics”. Can the authors explain how they can certify that the observed differences are due to the biases and not due to different environments?

Thanks for the comment. For each  $1^\circ \times 1^\circ$  cloud scene, we calculated  $N_{dAll}$  and  $N_d$  concurrently, which ensures same environmental conditions (such as cloud type and meteorology) when comparing the two quantities; thus their difference only reflects the role of retrieval errors. This is now clarified on lines 315-319.

5) There is a cloud regime dataset from MODIS observations, did the authors try to use that to separate the different effects? (Naeyong Cho, Jackson Tan and Lazaros Oreopoulos, L. (2021), MODIS Cloud Regime Level-3 Daily 1 deg x 1 deg, Goddard Earth Sciences Data and Information Services Center (GES DISC), 5067/MEASURES/MODISCR/EQANGD/DATA301)

Thank you for bring this dataset to our attention. Actually, the estimation on sensitivity by cloud regime is also not the focus in this study, and it has already been done by previous study(Gryspeerd and Stier, 2012). Thus we are not going to repeat it. To select convective clouds, we adopt the threshold of LTS < 16K (Rosenfeld et al., 2019) in the revised version (see response above).

5. I understand that the authors cannot study all the potential biases on the aerosol-cloud interactions, but I am wondering how did they chose? They considered the updraft velocity, but another important meteorological parameter is the humidity for which important effect on S has been demonstrated by previous studies.

Thanks for the comment. A discussion on other important meteorological parameters, including humidity as mentioned by the review, are now added to the introduction (lines 48-52). The reason we choose the updraft is that it determines cloud development as well as the maximum supersaturation at cloud base, and thus how many aerosols can be activated, which is the primary determinant of S (Quaas et al., 2020). Moreover, our understanding on its effect on S is not as sufficient as the humidity due to the difficulty in observing vertical velocity at a global scale. Thus, we placed our focus on the updraft instead of the humidity.

6. Some pixels can be mixed phase clouds but detected as purely liquid by the algorithm, impacting the effective radius, optical thickness, and Nd. I do not know the temperature range on the study, but does the dataset have liquid pixels potentially contaminated by ice?

Thanks for the comment. As noted in the original manuscript (now line 155), in addition to the flag of liquid phase, we also use the criterion of cloud top temperature (CTT) at 1x1 km<sup>2</sup> resolution higher than 268 K to avoid the potential contamination of ice pixels (Bennartz and Rausch, 2017). As shown in Fig. R1, the CTT ranges from 268 K to 300 K. Moreover, MODIS-derived CTT was found to underestimate aircraft observations (King et al., 2013); thus it seems unlikely that the selected liquid clouds here are contaminated by ice pixels.

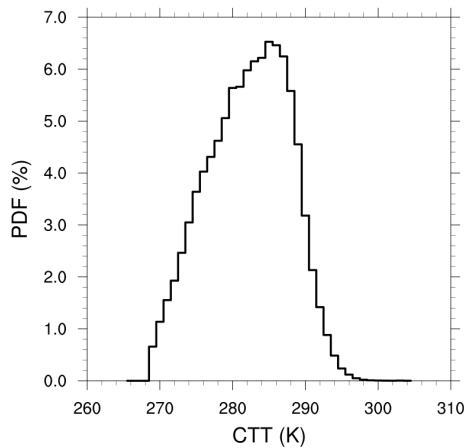

Figure R1: Probability distribution function (PDF) of cloud top temperature in this study.

7. Result section, there are many discussions on the result section which should belong to the discussion section (e.g., from line 176 to line 182, from line 184 to line 191, from line 204 to line 213, from line 237 to line 244, from line 331 to line 339).

Thanks for the comment. The reviewer is right that the ‘Discussion’ section in the original manuscript is more an outlook, since we wanted to discuss the caveats and suggest potential ways forward here. This section is now renamed as ‘Future improvements’ to circumvent misleading. The sentences mentioned by the reviewer are more relevant to the specific results and tightly linked to specific figures being discussed in the result section; thus we feel like it would be better to put them in their original place in the text. Actually, concluding discussions on the overall results were already placed in the ‘conclusion’ section (in the original manuscript) that is now renamed as ‘Conclusions and discussions’.

8. The authors decided to study different biases on the aerosol-cloud interactions separately and I am wondering if the biases are not correlated with each other. For example, on section 3.2, the impact of precipitation on S is highlighted but it could also be due to a correlation between precipitation and the CBH (or CGT). Did the authors try to study the effect of precipitation on S constraining for CBH and/or CGT for example? Same apply for the other biases.

The reviewer has a good point. We agree that the sources of bias could be also correlated with each other. However, given the impossibility to combine all datasets used in different sections together (e.g., the CBH/CGT from Terra are observed at 10:30 but the precipitation from Aqua at 13:30 local solar time), we are unable do such constraining with currently used datasets. But we are now planning to make use of CALIOP/CloudSat satellite observations, which provide simultaneous retrievals of aerosol extinction profiles, precipitation, and cloud base height (Mülmenstädt et al., 2018), such that an analysis accounting for all potential sources of bias can be performed. A corresponding statement is added on lines 462-467.

9. Section 3.3 I am confused by this section, and I am not sure to understand the results and the discussion about it, can the authors rephrase this section?

Rephrased as suggested.

- 1) I am skeptical about looking at aerosols next to clouds in general: The presence of a cloud means that the conditions are different than where there is clear sky. How can the authors make sure that the aerosols, meteorological parameters are the same between clear sky and cloudy sky?

In order to obtain ‘co-located’ aerosol-cloud retrievals for analysis, the often adopted choice is a  $10 \times 10$  gridding, within which sub-grid clear-sky and cloudy pixels co-exist (if clouds are not fully overcast) and are used for retrieving cloud and aerosol properties, respectively. Within the  $10 \times 10$  grid, aerosol concentrations are considered homogeneous (Anderson et al., 2003) so the clear-sky aerosol concentration is representative of that under the cloudy condition. A corresponding statement is added on lines 305-308. Also note that the same meteorological conditions are not required when talking about the representativeness of aerosol, except for relative humidity, which is associated with aerosol swelling. Actually, the swelling effect has been considered by using the metric  $\Delta L$ .

- 2) Also, the authors mentioned that studies on 3D effect and aerosol swelling next to observed clouds are lacking but there are two references about this subject that I think are relevant to this subject and do not appear on the present article: 1. <https://doi.org/10.5194/acp-17-13151-2017> 2. <https://doi.org/10.5194/acp-17-13165-2017>

Thanks for these two important references, which are now added. We also rephrase the associated sentences (lines 300-303).

10. Line 264 “It is also noted that SAOD shows first an increase and then decreases from the second DELTA L bin”, I do not see what the authors are refereeing to, or is it from the third bin?

We thank the reviewer for the attentive reading of the text. Yes, we meant the third bin. This is now corrected.

11. Line 276 “highly depends on the retrievals bias in clouds”, since there is no information on method biases, I believe this statement is too strong.

Thanks for the comment. The method biases have been already inferred by adding the 95% confidence interval as suggested by the reviewer.

12. Line 307, “The strength of the Twomey effect derived on a basis of column-integrated aerosol quantity...”, I am confused because on line 294, the authors said that SO<sub>4</sub>C AND SO<sub>4</sub>S mimic the column integrated, and here only SO<sub>4</sub>C shows a large slope so how is it directly linked to this? and SO<sub>4</sub>S does not show the trend described on line 307.

In this study, we use SO<sub>4</sub>C to mimic the column integrated aerosols (e.g., AI/AOD) but SO<sub>4</sub>S to mimic the surface aerosol quantities (e.g., aerosol extinction coefficient). This sentence has been rephrased to avoid misleading.

13. Along the article, different methods are employed to explain the different biases, I was expecting at the end a value of S considering all the possible biases, (precipitation, too close to the cloud, ...) for latitude bands for example and/or season, but no. Each paragraph is developed individually and at the end the discussion does not bring all of them together.

This is a very good suggestion by the reviewer. See response to specific point above(MajorRevision#8).

14. Figure 1:

- 1) Why the blue and white lines do not go until AI=1. The authors mention that the lowest values of AI are removed, but they do not refer to large values of AI (AI>0.5).  
Thanks for the reminder. We did not remove the large values of AI. This is just a plotting thing, and has been corrected.
- 2) Also, in the plot of PDF Vs AI, I do not understand why the PDF is almost equal to 0 for AI 0.5 whereas on the upper plot the PDF of the data are clearly greater than the 0 (might even be higher than the maximum at AI 0.8).  
As noted in the original manuscript (the caption of Fig. 1), the upper plot is a joint  $N_d$ -AI histogram, where each column is normalized so that it sums to 1. That is, this plot shows the probability of finding a specific  $N_d$ , given that a certain AI has been observed, instead of the occurrence frequency distribution of all data.
- 3) I think it would be better to indicate the value of the regression to see the difference between the blue and white lines and discuss about it, there is nothing about it in the data and method section.  
Thanks for the suggestion. The regression slopes (with 95% confidence interval) are now added to the plot and discussed (lines 203-205), and data used to generate this schematic diagram are also clarified in the caption.
- 4) Why the study uses the blue line instead of the white lines? The authors could infer the uncertainty through the 95% confidence interval using the white lines.  
Added. See response to specific point above (MajorRevision#2.5).

## Minor revisions

1. All along the text, there are several words which are unnecessary in my opinion (e.g., line 112 “basically”, line 175 “It is clear that”, line 175 “evident”, line 183 “remarkably”, line 219 “as expected”, line 220 “much”, line 226 “evidently”, line 229 “obviously”, line 232 “clearly”, line 271 “serious”, line 275 “sharply”, line 293 “practically”, line 319 “much”, line 341 “clearly”), and sometime they imply that something is evident but it is not the case (in my opinion).  
We thank the reviewer for the attentive reading. Modified as suggested.
2. Line 7 “consistent with stronger aerosol-cloud interactions at larger updraft velocity”, this is not the case for every type of clouds (e.g., arctic stratus).  
Thanks for the reminder. Corrected.
3. Line 25 “This study will”, I suggest moving this sentence to the last sentence of the paragraph.  
Thanks for the suggestion. Revised.
4. Line 30 “As reviewed recently...”, I do not understand in which context the present study is related to Quaas et al. (2020), will they consider the same biases, new ones... I think, the authors could clarify this part in the introduction. It makes sense afterward but not reading the introduction for the first time.  
Thanks for the suggestion. Quaas et al. (2020) is a recent review paper that summarized current challenges and issues obscuring an accurate estimate of the Twomey effect from satellite observations. Building on this review, we investigate several understudied aspects, which are important but not yet understood in a clear way as reviewed by (Quaas et al., 2020). We have added a sentence to make this clear (lines 57-58).
5. Line 55 “their strong correlation illustrated by in-situ observations of cumuliform clouds”, this sentence is important as it is a key correlation used through the study, so I think the authors could elaborate a bit more on the limitations of it.  
Thanks for the comment. We write a statement on this now in the revised manuscript (on lines 68-71).
6. Line 116 “a standard deviation higher than the mean value”, does this threshold come from somewhere specific?  
The threshold stems from the study by Saponaro et al. (2017), which has been cited in the main text.
7. Line 117 “the lowest 15%”, is this threshold based on Ma et al. (2018) or is it an ad-hoc choice. If the latter, the authors could specify why 15% is chosen.  
See response to specific point above and line 144.
8. Lin 123 (Feingold et al., 2021), it should not have parenthesis.  
Thank you. Corrected.

9. Line 140, is there a reason why “MYD06 5-km” is not written “MYD05 5x5 km<sup>2</sup>” to be consistent with “CloudSat data at a 1.4x2.5km<sup>2</sup>” .  
Thanks for the reminder. Corrected.
10. Line 146, the authors mention that they considered sulfate from MERRA-2, I am wondering if they considering other species.  
Thanks for the comment. Other species are not considered in this study, because variability in sulfate aerosols has been found to contributes the most strongly to variability in  $N_d$  among all aerosol species (McCoy et al., 2017). We now clarify this on lines 185-187.
11. Line 162 “Nd is essentially a function of both CCN and updraft”, a citation should be added here.  
Thank you. Added on line 210.
12. Line 190 “Sai is consistently higher than SAOD”, not always as for CGT 900m  
We thank the reviewer for this attentive reading of the text. Indeed, it is not the case for CGT 900m. We now revise the text accordingly.
13. Line 195 “They proposed...”, Who are they? Are they Reutter and al.? If so, they should not be put in parenthesis in the sentence before.  
Yes, ‘they’ are Reutter et al. Thanks for the comment. Corrected on line 249.
14. Line 199 “proxy of updraft (CBH/CGT)”, are the quartiles enough to discriminate the updraft regimes described by Reutter et al.? The quartiles defined regimes based on how likely an updraft regime occurs defining different regimes, but I am not sure that they separate in the regimes described by Reutter et al., I am not sure we are in category b.  
To check the robustness of the assumption, we further constrain the variation of CGT to a smaller range (i.e., < 10th and > 90th percentiles), and very similar results are obtained (Fig. S2). With the quasi-constant CGT, AI can thus be assumed as an indicator of regime. We now add a statement on this (lines 248).
15. Lines 201-203, ”As illustrated in the ...” I am confused by this sentence; can the authors rephrase this sentence? What I understand:
- 1) At low AI, the updraft should have limited impact on Nd (case a from Reutter et al.), but looking at the plot 3c and i, the updraft has a strong impact.  
Yes, at low AI, what should be expected is the similar distribution of  $N_d$  between different cloud dynamics as determined by the nature of aerosol-limited regime, or at least a slightly higher  $N_d$  for the strong updraft case. However, looking at the clean zone (AI < 0.15) in Fig. 3, the strong updraft is associated with much lower  $N_d$  as well as larger CER (generally larger than 14  $\mu\text{m}$ , the threshold for drizzle initiation) compared to the weak updraft. Note that this is not relevant to the role of strong updraft facilitating activation of cloud droplets but a possible role of precipitation and/or drizzle. This has been clarified in the original manuscript (now lines 258-263)
  - 2) On the opposite, at high AI, the updraft should most likely have a strong impact, but looking at the plot, the values are messier, and I do not observe a strong dependence on Nd with AI here. Can the dependence be quantified by the authors?  
It is known that the impact of aerosol on cloud is strong at low aerosol concentration, whereas a saturation effect occurs as the aerosol keeps rising. Thus the dependence of Nd on AI is supposed to be weak at high AI as we see.
  - 3) Maybe it is irrelevant, but I am wondering why the authors based their regimes on CGT and not the ratio CGT/AI?  
Thanks for the question. Since our focus is to contrast AI- $N_d$  relationships at strong (high) and weak (low) updrafts (CGT), it is more straightforward to illustrate AI- $N_d$  joint histogram for constrained CGT intervals. By doing so, the information of regimes can be also inferred via AI simply.
16. Line 228 “appears to strengthen the aerosol-Nd relationship”, can the author develop a bit more on this?  
This is a speculation made by (Painemal et al., 2020) to explain their observed higher aerosol- $N_d$  correlation for all clouds compared to non-drizzling clouds. Unfortunately, they did not dig more deeply.
17. Section 3 “AOD”, the authors mentioned earlier in the text that they would not consider AOD and prefer the use of AI, but they use AOD in this section. Why changing the considered parameter?  
Thank you for this question. We know that AI is not directly retrieved but calculated from AOD, so it is necessary to look at AOD as well when discussing retrieval problems. We now make this clear on lines 321-322.

18. Lines 264 to 268, I do not understand this part, can the authors rephrase it?  
Rephrased as suggested (lines 331-337).
19. Line 282 “it is clearly illustrated that CF regulates the negative correlation between DELTAL and DELTANd”, can the authors provide more information on that part?  
The detail on how CF regulates the negative correlation have been added on lines 354-356.
20. Line 287 “Given that CF also correlates closely with cloud dynamics”, the correlation presented by the authors are based on the medians which are not very significant in my opinion, 2D histogram and regression on the entire dataset would be better.  
Thanks for the comment. The joint histogram between CF and CGT is now added to Fig. 6 as suggested. Given that the relationship is highly non-linear, a single regression slope would not make much sense; such slope is thus not included.
21. Line 295 “commonly used”, can the author support this with citations? Maybe some references on the use of satellite observation combined with models to study aerosol cloud interactions are missing here.  
“Commonly used” here refers to AOD/AI and surface aerosol extinction coefficient from satellite-based and ground-based observations rather than SO4C and SO4S from reanalysis data. Although not as commonly adopted as AOD/AI and surface aerosol extinction coefficient, SO4C and SO4S were also used as CCN proxies by previous studies (McCoy et al., 2017; Jia et al., 2021). This sentence has been revised to avoid misleading, and the relevant references have been cited as well.
22. Line 296 “is considered to be more relevant to the amount of CCNs”, can the author provide a citation for this statement?  
Thank you. Added on line 371.
23. Line 302 “pre-binned method”, is it the method described in Figure 1? If this is the case, can it be explicit? I am still skeptical, and I would prefer statistics on the entire dataset and not on the medians (as done in Table S1).  
Clarified. As replied above, the analyses on both pre-binned data and entire data are included in the revised manuscript.
24. Line 302 “binend”-> “binned”.  
Corrected.
25. Line 320 “such as western North Pacific and the Atlantic”, this is true for SO4B but not for SO4C (also East coast of south America and South Africa), or maybe I am misunderstanding.  
The reviewer is right that high CVs are also evinced at East coast of south America and South Africa. We revise the text accordingly (line 397).
26. Line 321 “the spatial CV of SO4C exhibits a much smaller (0.88) value than those of SO4B and SO4S (1.84 and 1.79)”, are these values averaged over North Pacific and Atlantic, if this is the case the authors should specify the limit in lat/lon of the considered box.  
The values of spatial CVs are calculated from the global geographical distribution instead regional one. This is now clarified on line 394.
27. Line 330 “loose correlation ( $R < 0.3$ ) . . .”, can the authors quantify or rephrase that because I am not convinced especially for  $r(\text{SO4B}, \text{SO4S})$  which seems high when the ratio is small.  
Thanks for the suggestion. We now rephrase this sentence as suggested on line 408. Also note that this sentence is only relevant to  $r(\text{SO4B}, \text{SO4C})$  instead of  $r(\text{SO4B}, \text{SO4S})$ .
28. From line 331 to line 339, I find the conclusions on this discussion very strong. I think it should be at least quantified to support that.  
Modified as suggested.
29. Line 406 “In terms of aerosol . . .”, is this sentence part of point 3 or point 4?  
This is a part of point #3. Here, the use of aerosol reanalysis is recommended to avoid retrieval biases in AOD/AI, while in the point 4, the use of reanalysis is to address the problem of vertical co-location.
30. Line 419 “SO4B-S-C”, can the authors specify again on the different quantity in the conclusions?  
Thanks for the reminder. The meanings of SO4C, SO4B, and SO4S have been specified in the conclusion section on lines 506, 507, and 513.



## References

- Anderson, T. L., Charlson, R. J., Winker, D. M., Ogren, J. A., and Holmén, K.: Mesoscale Variations of Tropospheric Aerosols, *J. Atmos. Sci.*, 60, 119–136, [https://doi.org/10.1175/1520-0469\(2003\)060<0119:MVOTA;2.0.CO;2](https://doi.org/10.1175/1520-0469(2003)060<0119:MVOTA;2.0.CO;2), 2003.
- Bennartz, R. and Rausch, J.: Global and regional estimates of warm cloud droplet number concentration based on 13 years of AQUA-MODIS observations, *Atmos. Chem. Phys.*, 17, 9815–9836, <https://doi.org/10.5194/acp-17-9815-2017>, 2017.
- Gryspeerdt, E. and Stier, P.: Regime-based analysis of aerosol-cloud interactions, *Geophys. Res. Lett.*, 39, L21 802, <https://doi.org/10.1029/2012GL053221>, 2012.
- Gryspeerdt, E., Quaas, J., Ferrachat, S., Gettelman, A., Ghan, S., Lohmann, U., Morrison, H., Neubauer, D., Partridge, D. G., Stier, P., Takemura, T., Wang, H., Wang, M., and Zhang, K.: Constraining the instantaneous aerosol influence on cloud albedo, *Proc. Natl. Acad. Sci.*, 114, 4899–4904, <https://doi.org/10.1073/pnas.1617765114>, 2017.
- Gryspeerdt, E., McCoy, D. T., Crosbie, E., Moore, R. H., Nott, G. J., Painemal, D., Small-Griswold, J., Sorooshian, A., and Ziemba, L.: The impact of sampling strategy on the cloud droplet number concentration estimated from satellite data, *Atmos. Meas. Tech. Discuss.*, 2021, 1–25, <https://doi.org/10.5194/amt-2021-371>, 2021.
- Hasekamp, O. P., Gryspeerdt, E., and Quaas, J.: Analysis of polarimetric satellite measurements suggests stronger cooling due to aerosol-cloud interactions, *Nat. Commun.*, 10, 5405, <https://doi.org/10.1038/s41467-019-13372-2>, 2019.
- Jia, H., Ma, X., Yu, F., and Quaas, J.: Significant underestimation of radiative forcing by aerosol–cloud interactions derived from satellite-based methods, *Nat. Commun.*, 12, 3649, <https://doi.org/10.1038/s41467-021-23888-1>, 2021.
- King, N. J., Bower, K. N., Crosier, J., and Crawford, I.: Evaluating MODIS cloud retrievals with in situ observations from VOCALS-REx, *Atmos. Chem. Phys.*, 13, 191–209, <https://doi.org/10.5194/acp-13-191-2013>, 2013.
- Lareau, N. P., Zhang, Y., and Klein, S. A.: Observed Boundary Layer Controls on Shallow Cumulus at the ARM Southern Great Plains Site, *J. Atmos. Sci.*, 75, 2235–2255, <https://doi.org/10.1175/JAS-D-17-0244.1>, 2018.
- Ma, P.-L., Rasch, P. J., Chepfer, H., Winker, D. M., and Ghan, S. J.: Observational constraint on cloud susceptibility weakened by aerosol retrieval limitations, *Nat. Commun.*, 9, 2640, <https://doi.org/10.1038/s41467-018-05028-4>, 2018.
- McComiskey, A. and Feingold, G.: The scale problem in quantifying aerosol indirect effects, 12, 1031–1049, <https://doi.org/10.5194/acp-12-1031-2012>, 2012.
- McCoy, D. T., Bender, F. A., Mohrmann, J. K. C., Hartmann, D. L., Wood, R., and Grosvenor, D. P.: The global aerosol-cloud first indirect effect estimated using MODIS, MERRA, and AeroCom, *J. Geophys. Res. Atmos.*, 122, 1779–1796, <https://doi.org/10.1002/2016JD026141>, 2017.
- Mülmenstädt, J., Sourdeval, O., Henderson, D. S., L’Ecuyer, T. S., Unglaub, C., Jungandreas, L., Böhm, C., Russell, L. M., and Quaas, J.: Using CALIOP to estimate cloud-field base height and its uncertainty: the Cloud Base Altitude Spatial Extrapolator (CBASE) algorithm and dataset, *Earth Syst. Sci. Data*, 10, 2279–2293, <https://doi.org/10.5194/essd-10-2279-2018>, 2018.
- Painemal, D., Chang, F.-L., Ferrare, R., Burton, S., Li, Z., Smith Jr., W. L., Minnis, P., Feng, Y., and Clayton, M.: Reducing uncertainties in satellite estimates of aerosol–cloud interactions over the subtropical ocean by integrating vertically resolved aerosol observations, *Atmos. Chem. Phys.*, 20, 7167–7177, <https://doi.org/10.5194/acp-20-7167-2020>, 2020.
- Quaas, J., Boucher, O., Bellouin, N., and Kinne, S.: Satellite-based estimate of the direct and indirect aerosol climate forcing, *J. Geophys. Res. Atmos.*, 113, D05 204, <https://doi.org/10.1029/2007JD008962>, 2008.
- Quaas, J., Arola, A., Cairns, B., Christensen, M., Deneke, H., Ekman, A. M. L., Feingold, G., Fridlind, A., Gryspeerdt, E., Hasekamp, O., Li, Z., Lipponen, A., Ma, P.-L., Mülmenstädt, J., Nenes, A., Penner, J. E., Rosenfeld, D., Schrödner, R., Sinclair, K., Sourdeval, O., Stier, P., Tesche, M., van Diedenhoven, B., and Wendisch, M.: Constraining the Twomey effect from satellite observations: issues and perspectives, *Atmos. Chem. Phys.*, 20, 15 079–15 099, <https://doi.org/10.5194/acp-20-15079-2020>, 2020.

- Rosenfeld, D., Zhu, Y., Wang, M., Zheng, Y., Goren, T., and Yu, S.: Aerosol-driven droplet concentrations dominate coverage and water of oceanic low-level clouds, *Science* (80-. ), 363, <https://doi.org/10.1126/science.aav0566>, 2019.
- Saponaro, G., Kolmonen, P., Sogacheva, L., Rodriguez, E., Virtanen, T., and de Leeuw, G.: Estimates of the aerosol indirect effect over the Baltic Sea region derived from 12 years of MODIS observations, *Atmos. Chem. Phys.*, 17, 3133–3143, <https://doi.org/10.5194/acp-17-3133-2017>, 2017.
- Zheng, Y., Rosenfeld, D., and Li, Z.: Quantifying cloud base updraft speeds of marine stratocumulus from cloud top radiative cooling, *Geophys. Res. Lett.*, 43, <https://doi.org/10.1002/2016GL071185>, 2016.
