# Supplementary material for: Addressing the difficulties in quantifying the Twomey effect for marine warm clouds from multi-sensor satellite observations and reanalysis
Source: Copernicus journal article supplement (doi:10.5194/acp-2021-999), 2022-01-07
Supplement: Supplementary file [file acp-2021-999-AC4-supplement.pdf]

# Response to the Reviewer's Comments

March 17, 2022

We would like to thank the reviewers for the effort in helping us improve the manuscript. Below we respond point-by-point to the comments, with the reviewer comments in black, and our responses in blue. The manuscript has been revised accordingly. The line numbers in the response are for the revised version with tracked changes.

## Comments by Reviewer #1

This study investigates the changes of Twomey effect for marine warm clouds with various influential factors including the updraft, precipitation, retrieval errors, and vertical co-location between aerosol and clouds. Valuable results have been obtained, which can improve our understanding of the radiative impacts from aerosol-cloud interaction from perspective of satellite observations. Also, the paper is well written. I personally think this manuscript is suitable for publication after a minor revision.

We thank the reviewer for this thoughtful and constructive statement. We have revised the manuscript carefully according to the reviewer's comments. Please see the following detailed point-by-point responses.

### Detail comments

1. Line 19-21, In addition to the radiative impacts of aerosols by serving as CCN, aerosols can also affect the development of clouds and then precipitation and radiation by modifying the thermal structure of atmosphere via direct radiative effect.

Thanks for the comment. This effect is now included in the introduction on lines 23-24.

*Added text:*

*Lines 23-24: 'Additionally, absorbing aerosols can also alter the cloud distribution by perturbing the atmospheric temperature structure, known as semi-direct effects (Allen et al., 2019).'*

2. Line 24-25, regarding the rapid adjustments, one reference is suggested here which showed the increase of cloud liquid water path and decrease of cloud re with increased Nd via Twomey effect, Zhao and Garrett (2015, doi: 10.1002/2014GL062015).

Thanks for bringing this study to our attention. We now cite this paper in the revised text (line 29).

3. Line 28-29, Actually even with the same climate model simulation (such as CAM5), the aerosol first indirect effect also varies with the aerosol variables that are used to present the aerosol amount.

We agree with the reviewer that the choice of aerosol proxy can play a critical role. This point was discussed in the original manuscript (now lines 41-42).

4. Line 33-41, There are various influential factors, which are not limited to these five points. For example, the existence of precipitation particles within clouds as indicated by Yang et al. (2021, doi: 10.1029/2021JD035609) based on satellite observations, the aerosol amount or availability of water vapor amount as indicated by Qiu et al. (2017, doi: 10.1016/j.atmosenv.2017.06.002), cloud types or vertical locations as indicated by Zhao et al. (2019, doi: 10.3390/atmos10010019), and potential large uncertainties in cloud retrievals as indicated by Zhao et al. (2012, doi: 10.1029/2011JD016792), and so on.

Thanks for the comment. These influential factors have been discussed in the introduction and the relevant references have been cited.

*Added/Modified text:*

*Lines 49-53: 'Additionally, meteorological conditions, e.g., lower tropospheric stability (Ma et al., 2018), relative humidity (Quaas et al., 2010), availability of water vapor (Qiu et al., 2017), and wind shear (Fan et al., 2009), and vertical overlapping status of aerosol and cloud layers (Costantino and Bréon, 2013; Zhao et al., 2019) also play roles in regulating aerosol-cloud interactions. It is worth noting that most of these studies calculated  $S$  based on cloud effective radius rather than  $N_d$ , and so are subject to even more errors from the problem of stratification by liquid water path.'*

*Lines 180-181: 'As a sink of  $N_d$ , drizzle could also affect the aerosol-cloud interactions even without rain falling on ground (Yang et al., 2021), so we also include drizzling clouds into precipitating cases.'*

*Lines 88-91: 'In terms of  $N_d$ , retrievals for 3-D-shaped clouds and partially cloudy pixels deviate from the retrieval assumptions of overcast homogenous cloud and 1-D plane-parallel radiative transfer, thereby appear to lead to an overestimation of CER (Coakley et al., 2005; Matheson et al., 2006; Zhang and Platnick, 2011; Zhao et al., 2012), in turn, an underestimated  $N_d$  (Grosvenor et al., 2018).'*

5. Line 54-56, Good idea. However ,with this assumption or method, we may limit the cloud types as cumuliform clouds.

We thank the reviewer for this very important comment. To ensure the applicability of CBH as a updraft proxy. we now restrict the analyses related to CBH to convective clouds only by adopting the threshold of  $LTS < 16$  K (Rosenfeld et al., 2019). A similar dependence, i.e., increasing  $S$  with CBH, is also seen even after constraining the cloud type (Figure 2a in the revised manuscript). It is worth mentioning that, beyond the CBH, the CGT was used as an alternative proxy for the updraft regardless the cloud types, since it has been observed to be associated with the cloud-base updraft for shallow cumuliform clouds(Lareau et al., 2018) and also correlated with cloud-base updraft for stratiform clouds via modulating cloud top cooling (Zheng et al., 2016). Therefore, the conclusion of updraft-dependency holds for all cloud types. We now clarify these in the method section on lines 160-167, and the Figure 2a is revised accordingly.

*Added/Modified text:*

*Lines 160-167: 'To overcome the lack of the global updraft observation, we utilize satellite-based retrievals for CBH as a proxy of cloud base updraft for cumuliform clouds, based on the finding that these two quantities exhibit an approximately linear correlation for convective clouds (Zheng and Rosenfeld, 2015). Here, clouds are considered convective for low troposphere static stability (LTS) less than 16 K (Rosenfeld et al., 2019). Additionally, cloud geometrical thickness (CGT; the difference between cloud top height and CBH) is used as an alternative proxy for the updraft regardless cloud types, since it has been observed to be associated with the cloud-base updraft for shallow cumuliform clouds (Lareau et al., 2018) and also correlated with cloud-base updraft for stratiform clouds via modulating cloud top cooling (Zheng et al., 2016).'*

6. Line 65-66, The reference mentioned above (Yang et al. 2021) also took use of the simple threshold value method with 14  $\mu\text{m}$ .

Thank you. The paper is now cited in the revised manuscript.

7. Line 69, Do the authors mean "Solving this problem is helpful to ..."?

Thanks for the comment. We have rephrased the sentence as suggested by the reviewer.

8. Line 77-81, Actually, the existence of aerosols could also cause biases to satellite-based cloud retrievals. As indicated by Li et al. (2014, doi: 10.1002/2013JD021053), the existence of absorbing aerosols could cause the satellite based retrieval of optical depth lower, effective radius higher, and so on.

Thanks for the comment. We now cite this paper and discuss the retrieval uncertainty on lines 94-95.

*Added text:*

*Lines 94-95: 'In addition to the assumptions on clouds, the existence of aerosols above clouds can also affect the retrieval of cloud optical depth (Haywood et al., 2004; Li et al., 2014), in turn bias  $N_d$  calculation.'*

9. Line 107-110, previous studies have already indicated that the aerosol-cloud interaction is sensitive to the spatial resolution. How do the authors consider this point?

Thanks for this comment. The reviewer is right that the varying spatial resolution can also play a role. We did not explicitly consider this issue since this is not the focus of this study, but a discussion on this issue is now added on lines 130-133.

*Added text:*

*Lines 130-133: 'It is worth mentioning that, as  $S$  was found to vary with the spatial resolution of data (Sekiguchi et al., 2003; McComiskey and Feingold, 2012), the different data resolutions between section 3.2 and other sections can lead to a difference in  $S$ ; but this is not the focus here.'*

10. Line 110-111, It is well known that the retrieval uncertainties are large over polar regions, how about that over land regions? A reference might be helpful.

Thanks for the suggestion. We do this in the revised manuscript (line 134).

*Modified text:*

*Line 134: 'This study is restricted to global ocean with latitude between  $60^\circ S$  and  $60^\circ N$  because of limited quality of retrievals of aerosol size parameters (Levy et al., 2013) and  $N_d$  (Gryspeerd et al., 2021) over land and polar regions.'*

11. Line 112-125, why are the Level 3 aerosol data but Level 2 cloud data used in this study?

This is because the use of L2 cloud data can avoid the aggregation bias of  $N_d$  calculation (Feingold et al., 2021), and also enable us to select more reliable cloud retrievals on the level of the satellite pixel (1x1 km<sup>2</sup>) with different flags as detailed on lines 154-159. These reliable cloud retrievals are then aggregated to larger scales to match Level 3 aerosol retrievals.

12. Line 123, it might be better used as Feingold et al. (2021)

Thanks for the reminder. Corrected.

13. Line 130-136, what are the potential limitations or uncertainties in the cloud base height retrievals by the introduced method? It is worthy to briefly describe.

The best performance of this algorithm is achieved for clouds with CBH around 1 km and CGT below 1 km. For such heights, which are characteristic for oceanic clouds considered in this analysis, the root mean square error ranges between 300–350 m. It is important to note that the MISR cloud-base height retrieval is limited to  $CBH > 560$  m (Böhm et al., 2019). At this lower end of the detection range, a slight underestimation of the CBH is expected (Böhm et al., 2019). This is now clarified on lines 170-174.

*Added/Modified text:*

*Lines 170-174: 'The best performance of this algorithm is achieved for clouds with CBH around 1 km and CGT below 1 km. For such heights, which are characteristic for oceanic clouds considered in this analysis, the root mean square error ranges between 300–350 m. It is important to note that the MISR cloud-base height retrieval is limited to  $CBH > 560$  m (Böhm et al., 2019). At this lower end of the detection range, a slight underestimation of the CBH is expected (Böhm et al., 2019).'*

14. Line 136-141, even within non-precipitating clouds, drizzle could exist and affect the aerosol-cloud interaction, as indicated by the reference mentioned earlier Yang et al. (2021), how could the authors consider this impact?

Thanks for the question. As the drizzle affects the aerosol-cloud interactions in a same manner with rainfall, i.e., as a strong sink of  $N_d$ , we considered both 'liquid precipitation' and 'possible drizzle' as precipitating clouds (see line 179). The important result of Yang et al. (2021) is now mentioned on lines 180-181.

*Added text:*

*Lines 180-181: 'As a sink of  $N_d$ , drizzle could also affect the aerosol-cloud interactions even without rain falling on ground (Yang et al., 2021), so we also include drizzling clouds into precipitating cases.'*

15. Line 180-181, One possibility is the large volume of datasets. Could the data selection also play a role to the higher correlation?

The reviewer has a great point. It might somehow play a role. However, given the similar cloud type, i.e., ice-free and single layered clouds, selected in both studies, we can not conclude the data selection is the reason for the higher correlation.

16. Line 200-201, it is easy to understand that the low AI zone is more likely aerosol-limited. However, I cannot understand why the high AI zone is close to updraft-limited regime if we do not know how large the updraft is? Could the authors explain more?

Thanks for the question. As we have limited the proxy of updraft to a certain range ( $<$  the 10th/25th percentile or  $>$  the 75th/90th percentile) in Fig.3 and Fig. S2, it is thus assumed that the ratio of updraft to AI is dominated by AI. A statement on this is now added on line 248.

*Added text:*

*Line 248: 'Note that applying the 10th and 90th percentiles also yields similar results as shown in Fig. S2.'*

17. Line 226, I would suggest using the same format, either with or without parenthesis for  $\ln$  AI.

Thanks for the reminder. We now remove the parentheses of  $\ln$  (AI),  $\ln$  ( $N_d$ ),  $\ln$ (SO<sub>4</sub>C/B/S) throughout the text.

18. Line 233-237, if possible, I personally would like to suggest separating this long sentence to a few short sentences.

Thank you for the suggestion. This sentence is now split into three short ones (lines 288-292).

*Modified text:*

*Lines 288-292: 'As shown in Fig 4g, the polluted clouds consist predominately of the non-raining clouds as a result of the suppression of precipitation by aerosols, thus maintaining a high value of  $N_d$ . Instead, the majority of the clean clouds are raining ones that are significantly subjected to the sink processes for  $N_d$  and/or aerosol scavenging (Boucher and Quaas, 2013) (Fig. 4f), hence corresponding to a lower  $N_d$ .'*

19. Line 270, 'appears to'-> 'appear to'

Thank you. Corrected.

20. Line 317, why do the authors choose to use daily time series values instead of hourly?

Because aerosol and cloud properties are linked on a daily basis throughout the manuscript, we thus choose daily time series to derive the temporal CV so as to quantify the day-to-day variability of SO<sub>4</sub>.

## References

- Allen, R. J., Amiri-Farahani, A., Lamarque, J.-F., Smith, C., Shindell, D., Hassan, T., and Chung, C. E.: Observationally constrained aerosol–cloud semi-direct effects, *npj Clim. Atmos. Sci.*, 2, 16, <https://doi.org/10.1038/s41612-019-0073-9>, 2019.
- Böhm, C., Sourdeval, O., Mülmenstädt, J., Quaas, J., and Crewell, S.: Cloud base height retrieval from multi-angle satellite data, *Atmos. Meas. Tech.*, 12, 1841–1860, <https://doi.org/10.5194/amt-12-1841-2019>, 2019.
- Boucher, O. and Quaas, J.: Water vapour affects both rain and aerosol optical depth, *Nat. Geosci.*, 6, 4–5, <https://doi.org/10.1038/ngeo1692>, 2013.
- Coakley, J. A., Friedman, M. A., and Tahnk, W. R.: Retrieval of Cloud Properties for Partly Cloudy Imager Pixels, *J. Atmos. Ocean. Technol.*, 22, 3–17, <https://doi.org/10.1175/JTECH-1681.1>, 2005.
- Costantino, L. and Bréon, F.-M.: Aerosol indirect effect on warm clouds over South-East Atlantic, from co-located MODIS and CALIPSO observations, *Atmos. Chem. Phys.*, 13, 69–88, <https://doi.org/10.5194/acp-13-69-2013>, 2013.
- Fan, J., Yuan, T., Comstock, J. M., Ghan, S., Khain, A., Leung, L. R., Li, Z., Martins, V. J., and Ovchinnikov, M.: Dominant role by vertical wind shear in regulating aerosol effects on deep convective clouds, *J. Geophys. Res.*, 114, D22 206, <https://doi.org/10.1029/2009JD012352>, 2009.
- Feingold, G., Goren, T., and Yamaguchi, T.: Quantifying Albedo Susceptibility Biases in Shallow Clouds, *Atmos. Chem. Phys. Discuss.*, 2021, 1–31, <https://doi.org/10.5194/acp-2021-859>, 2021.

- Grosvenor, D. P., Sourdeval, O., Zuidema, P., Ackerman, A., Alexandrov, M. D., Bennartz, R., Boers, R., Cairns, B., Chiu, J. C., Christensen, M., Deneke, H., Diamond, M., Feingold, G., Fridlind, A., Hünerbein, A., Knist, C., Kollias, P., Marshak, A., McCoy, D., Merk, D., Painemal, D., Rausch, J., Rosenfeld, D., Russchenberg, H., Seifert, P., Sinclair, K., Stier, P., van Diedenhoven, B., Wendisch, M., Werner, F., Wood, R., Zhang, Z., and Quaas, J.: Remote Sensing of Droplet Number Concentration in Warm Clouds: A Review of the Current State of Knowledge and Perspectives, *Rev. Geophys.*, 56, 409–453, <https://doi.org/10.1029/2017RG000593>, 2018.
- Gryspeerd, E., McCoy, D. T., Crosbie, E., Moore, R. H., Nott, G. J., Painemal, D., Small-Griswold, J., Sorooshian, A., and Ziemba, L.: The impact of sampling strategy on the cloud droplet number concentration estimated from satellite data, *Atmos. Meas. Tech. Discuss.*, 2021, 1–25, <https://doi.org/10.5194/amt-2021-371>, 2021.
- Haywood, J. M., Osborne, S. R., and Abel, S. J.: The effect of overlying absorbing aerosol layers on remote sensing retrievals of cloud effective radius and cloud optical depth, *Q. J. R. Meteorol. Soc.*, 130, 779–800, <https://doi.org/10.1256/qj.03.100>, 2004.
- Lareau, N. P., Zhang, Y., and Klein, S. A.: Observed Boundary Layer Controls on Shallow Cumulus at the ARM Southern Great Plains Site, *J. Atmos. Sci.*, 75, 2235–2255, <https://doi.org/10.1175/JAS-D-17-0244.1>, 2018.
- Levy, R. C., Mattoo, S., Munchak, L. A., Remer, L. A., Sayer, A. M., Patadia, F., and Hsu, N. C.: The Collection 6 MODIS aerosol products over land and ocean, *Atmos. Meas. Tech.*, 6, 2989–3034, <https://doi.org/10.5194/amt-6-2989-2013>, 2013.
- Li, Z., Zhao, F., Liu, J., Jiang, M., Zhao, C., and Cribb, M.: Opposite effects of absorbing aerosols on the retrievals of cloud optical depth from spaceborne and ground-based measurements, *J. Geophys. Res. Atmos.*, 119, 5104–5114, <https://doi.org/10.1002/2013JD021053>, 2014.
- Ma, P.-L., Rasch, P. J., Chepfer, H., Winker, D. M., and Ghan, S. J.: Observational constraint on cloud susceptibility weakened by aerosol retrieval limitations, *Nat. Commun.*, 9, 2640, <https://doi.org/10.1038/s41467-018-05028-4>, 2018.
- Matheson, M. A., Coakley, J. A., and Tahnk, W. R.: Multiyear Advanced Very High Resolution Radiometer observations of summertime stratocumulus collocated with aerosols in the northeastern Atlantic, *J. Geophys. Res.*, 111, D15 206, <https://doi.org/10.1029/2005JD006890>, 2006.
- McComiskey, A. and Feingold, G.: The scale problem in quantifying aerosol indirect effects, 12, 1031–1049, <https://doi.org/10.5194/acp-12-1031-2012>, 2012.
- Qiu, Y., Zhao, C., Guo, J., and Li, J.: 8-Year ground-based observational analysis about the seasonal variation of the aerosol-cloud droplet effective radius relationship at SGP site, *Atmos. Environ.*, 164, 139–146, <https://doi.org/10.1016/j.atmosenv.2017.06.002>, 2017.
- Quaas, J., Stevens, B., Stier, P., and Lohmann, U.: Interpreting the cloud cover – aerosol optical depth relationship found in satellite data using a general circulation model, *Atmos. Chem. Phys.*, 10, 6129–6135, <https://doi.org/10.5194/acp-10-6129-2010>, 2010.
- Rosenfeld, D., Zhu, Y., Wang, M., Zheng, Y., Goren, T., and Yu, S.: Aerosol-driven droplet concentrations dominate coverage and water of oceanic low-level clouds, *Science (80-. )*, 363, <https://doi.org/10.1126/science.aav0566>, 2019.
- Sekiguchi, M., Nakajima, T., Suzuki, K., Kawamoto, K., Higurashi, A., Rosenfeld, D., Sano, I., and Mukai, S.: A study of the direct and indirect effects of aerosols using global satellite data sets of aerosol and cloud parameters, *J. Geophys. Res. Atmos.*, 108, 2002JD003 359, <https://doi.org/10.1029/2002JD003359>, 2003.
- Yang, Y., Zhao, C., Wang, Y., Zhao, X., Sun, W., Yang, J., Ma, Z., and Fan, H.: Multi-Source Data Based Investigation of Aerosol-Cloud Interaction Over the North China Plain and North of the Yangtze Plain, *J. Geophys. Res. Atmos.*, 126, <https://doi.org/10.1029/2021JD035609>, 2021.
- Zhang, Z. and Platnick, S.: An assessment of differences between cloud effective particle radius retrievals for marine water clouds from three MODIS spectral bands, *J. Geophys. Res.*, 116, D20 215, <https://doi.org/10.1029/2011JD016216>, 2011.
- Zhao, C., Xie, S., Klein, S. A., Protat, A., Shupe, M. D., McFarlane, S. A., Comstock, J. M., Delanoë, J., Deng, M., Dunn, M., Hogan, R. J., Huang, D., Jensen, M. P., Mace, G. G., McCoy, R., O’Connor, E. J., Turner, D. D., and Wang, Z.: Toward understanding of differences in current cloud retrievals of ARM ground-based measurements, *J. Geophys. Res. Atmos.*, 117, D10 206, <https://doi.org/10.1029/2011JD016792>, 2012.

- Zhao, C., Zhao, L., and Dong, X.: A Case Study of Stratus Cloud Properties Using In Situ Aircraft Observations over Huanghua, China, *Atmosphere (Basel)*, 10, 19, <https://doi.org/10.3390/atmos10010019>, 2019.
- Zheng, Y. and Rosenfeld, D.: Linear relation between convective cloud base height and updrafts and application to satellite retrievals, *Geophys. Res. Lett.*, 42, 6485–6491, <https://doi.org/10.1002/2015GL064809>, 2015.
- Zheng, Y., Rosenfeld, D., and Li, Z.: Quantifying cloud base updraft speeds of marine stratocumulus from cloud top radiative cooling, *Geophys. Res. Lett.*, 43, <https://doi.org/10.1002/2016GL071185>, 2016.

# Addressing the difficulties in quantifying the Twomey effect for marine warm clouds from multi-sensor satellite observations and reanalysis

Hailing Jia<sup>1</sup>, Johannes Quaas<sup>1</sup>, Edward Gryspeerdt<sup>2,3</sup>, Christoph Böhm<sup>4</sup>, and Odran Sourdeval<sup>5</sup>

<sup>1</sup>Leipzig Institute for Meteorology, Universität Leipzig, Leipzig, Germany

<sup>2</sup>Space and Atmospheric Physics Group, Imperial College London, UK

<sup>3</sup>Grantham Institute for Climate Change and the Environment, Imperial College London, UK

<sup>4</sup>Institute for Geophysics and Meteorology, University of Cologne, Cologne, Germany

<sup>5</sup>Laboratoire d'Optique Atmosphérique, Université de Lille, CNRS, Lille, France

**Correspondence:** Hailing Jia (hailing.jia@uni-leipzig.de)

**Abstract.** Aerosol–cloud interaction is the most uncertain component of the overall anthropogenic forcing of the climate, in which the Twomey effect plays a fundamental role. ~~Satellite-based estimates~~ The microphysical component of the Twomey effect ~~– cloud droplet number concentration ( $N_d$ )-to-aerosol sensitivity ( $S$ ) – is central to the Twomey effect calculation. However, satellite-based estimates of  $S$  are especially challenging, mainly due to the difficulty in disentangling aerosol effects on ~~cloud~~ droplet number concentration ( $N_d$ ) from possible confounders. By combining multiple satellite observations and reanalysis, this study investigates the impacts of a) updraft, b) precipitation, c) retrieval errors, as well as ~~(d)~~ vertical co-location between aerosol and cloud, on the assessment of  ~~$N_d$ -to-aerosol sensitivity ( $S$ )~~ in the context of marine warm (liquid) clouds. Our analysis suggests that  $S$  increases remarkably with both cloud base height and cloud geometric thickness (proxies for vertical velocity at cloud base), consistent with stronger aerosol–cloud interactions at larger updraft velocity for mid- and low-latitude clouds. In turn, introducing the confounding effect of aerosol–precipitation interaction can artificially amplify  $S$  by an estimated 21 %, highlighting the necessity of removing precipitating clouds from analyses on ~~the Twomey effect~~  $S$ . It is noted that the retrieval biases in aerosol and cloud appear to underestimate  $S$ , in which cloud fraction acts as a key modulator, making it practically difficult to balance the accuracies of aerosol–cloud retrievals at aggregate scales (e.g.,  $1^\circ \times 1^\circ$  grid). Moreover, we show that using column-integrated sulfate mass concentration (SO4C) to approximate sulfate concentration at cloud base (SO4B) can result in a degradation of correlation with  $N_d$ , along with a nearly twofold enhancement of  $S$ , mostly attributed to the inability of SO4C to capture the full spatio-temporal variability of SO4B. These findings point to several potential ways forward to account for the major influential factors practically by means of satellite observations and reanalysis, aiming at ~~an optimal observational estimate~~ optimal observational estimates of global radiative ~~forcing~~ forcings due to the Twomey effect and also cloud adjustments.~~

## 20 1 Introduction

Aerosol particles, by acting as cloud condensation nuclei (CCN), can modify cloud properties and precipitation formation, altering the radiative flux at the top-of-atmosphere, which is known as effective radiative forcing from aerosol-cloud interactions ( $ERF_{aci}$ ) (~~Forster et al., 2021~~)(Forster et al., 2021). Additionally, absorbing aerosols can also alter the cloud distribution by perturbing the atmospheric temperature structure, known as semi-direct effects (Allen et al., 2019).  $ERF_{aci}$  may be further subdivided into (i) the radiative forcing due to aerosol-cloud interactions ( $RF_{aci}$ ), also known as the Twomey effect, describing the increased cloud albedo resulted from enhancement in cloud droplet number concentration ( $N_d$ ) due to an increase in anthropogenic aerosol emissions (Twomey, 1974), and (ii) rapid adjustments, which are essentially the consequent responses of liquid water path and cloud horizontal extent to changed  $N_d$  via the Twomey effect (Albrecht, 1989; Ackerman et al., 2004; Bellouin et al., 2020). ~~This study will focus on the Twomey effect only due to its fundamental role in aerosol-cloud interactions~~(Albrecht, 1989; Ackerman et al., 2004). Although extensive investigations have been made to quantify the Twomey effect, significant uncertainties remain on its magnitude. This study will discuss the Twomey effect with a focus on the sensitivity of  $N_d$  to CCN perturbations, due to its fundamental role in aerosol-cloud interactions. Note that the related radiative forcing will be not estimated here, as the anthropogenic perturbation to CCN concentrations is highly uncertain and not easily accessible from observational data.

Current climate models suggest diverse magnitudes of the Twomey effect even with identical anthropogenic aerosol emission perturbation (Gryspeerd et al., 2020; Smith et al., 2020). Thus, observational data at the climate-relevant scale, i.e., satellite retrievals, are required to quantify and constrain the Twomey effect globally, basically the sensitivity of  $N_d$  to CCN perturbations (Seinfeld et al., 2016). As reviewed recently by Quaas et al. (2020), there are, however, several uncertainties in inferring the  $N_d$ -to-CCN sensitivity ( $S = \frac{d \ln N_d}{d \ln N_{CCN}}$ , where  $N_{CCN}$  means proxies for CCN number concentration) from satellite observations, hindering its applicability to further evaluate climate models or quantify  $RF_{aci}$  from data. Most of them have been reported to bias  $S$  toward a lower value, in turn leading to an overall underestimated  $ERF_{aci}$ , including (i) the instrument detectability limitations on aerosol loading in pristine environments (Ma et al., 2018a), (ii) the inadequate proxy (such as aerosol optical depth (AOD) or a variant thereof) for CCN owing to the lack of information on the aerosol size and chemical composition (Stier, 2016; Hasekamp et al., 2019), (iii) the limited usability of AOD- $N_d$  relationship under present day (PD) to determine the change in  $N_d$  caused by anthropogenic aerosol emission due to the differing preindustrial (PI) and PD aerosol environments (Penner et al., 2011; Gryspeerd et al., 2017), and (iv) the satellite sampling biases, which tends to discard clouds with high cloud fraction due to the inability of aerosol retrievals under cloudy conditions and thereby results in an artificial cloud regime selection (i.e., omitting more retrieval-reliable stratiform clouds; Gryspeerd and Stier, 2012; Jia et al., 2021). ~~Beyond the aforementioned aspects of the problem, another~~ Additionally, meteorological conditions, e.g., lower tropospheric stability (Ma et al., 2018a), relative humidity (Quaas et al., 2010), availability of water vapor (Qiu et al., 2017), and wind shear (Fan et al., 2009), and vertical overlapping status of aerosol and cloud layers (Costantino and Bréon, 2013; Zhao et al., 2019) also play roles in regulating aerosol-cloud interactions. It is worth noting that most of these studies calculated  $S$  based on cloud effective radius rather than  $N_d$ , and so are subject to even more errors from the problem of stratification by liquid water path. Currently, a key difficulty in interpreting satellite observed aerosol- $N_d$  relationships is to isolate the causal impact of aerosols



on  $N_d$  from other confounding factors modifying the variations of aerosol and cloud simultaneously, specifically (i) updraft, 55 determining cloud development as well as the maximum supersaturation at cloud base and thus aerosol population that can be activated, (ii) precipitation processes, depleting cloud droplets via coagulation and scavenging sub-cloud aerosol particles (iii) retrieval errors, biasing retrieved aerosol and cloud properties concurrently. However, a clear understanding on how they affect the estimates of  $S$  quantitatively is lacking from the perspective of satellite observations (Quaas et al., 2020).

In terms of the updraft, in-situ aircraft measurements (Berg et al., 2011; Jia et al., 2019b), ground-based remote sensing 60 (McComiskey et al., 2009; Schmidt et al., 2015), as well as detailed parcel model simulations (Reutter et al., 2009; Chen et al., 2016) clearly showed the dependency of  $S$  on updraft, with generally larger  $S$  at stronger updraft. In particular, co-variability of updrafts and aerosol concentrations has been found to result in a stronger ~~Twomey effect~~  $S$  than keeping vertical velocity ( $w$ ) constant (Bougiatioti et al., 2020; Kacarab et al., 2020). As noted by Gryspeerdt et al. (2017), the updraft may roughly explain 20 % of the variability in  $\Delta N_d$  from its PI-PD difference, adding to the uncertainty of the  $ERF_{aci}$  estimate. 65 Despite of the importance of dynamical constraint, it is not easily applicable to the analysis of satellite data due to the lack of updraft observation near cloud base at a global scale. As an alternative, cloud base height (CBH) may potentially serve as a practical proxy for the updraft at the base of liquid cloud because of their ~~strong-tightly linear~~ correlation illustrated by in-situ observations of cumuliform clouds (Zheng and Rosenfeld, 2015). Therefore Although data used to draw this conclusion by Zheng and Rosenfeld (2015) were collected from only three locations, they covered various boundary conditions over both 70 continent and ocean. Moreover, a theoretical framework has also been established to support the observed empirical relationship (Zheng, 2019), lending credibility to applying CBH as a proxy of the updraft. Building on this, recently developed CBH retrievals (Mülmenstädt et al., 2018; Böhm et al., 2019) offer an opportunity to gain some insight into the potential role updraft variability may play in the global  $ERF_{aci}$  assessment.

In addition to the updraft, precipitation formation further complicates the derivation of the strength of ~~the Twomey effect~~  $S$ , 75 since it can efficiently deplete cloud droplets and scavenge aerosols from clouds (Gryspeerdt et al., 2015). In such case, the change of  $N_d$  is not necessarily related to actual aerosol perturbations (Chen et al., 2014) but rather to the intensity of cloud sink, thus in principle, should not be directly applied to infer  $\Delta N_d$  driven by anthropogenic emissions. However, due to the lack of simultaneous observations of precipitation and aerosol/cloud properties from passive satellite remote sensing alone, most of ACI estimates did not consider the influence of precipitation (Quaas et al., 2008; Ma et al., 2014; Gryspeerdt et al., 2017; Jia et al., 80 2021) or just roughly identify the occurrence of rain relying on some simplified metrics, such as the threshold of 14  $\mu m$  cloud effective radius (CER) for rain initiation (~~Rosenfeld et al., 2019; ?~~) (Gerber, 1996; Rosenfeld et al., 2019; Yang et al., 2021; Zhang et al., 20 or the difference of CER between retrievals employing the bands of 2.1 and 3.7  $\mu m$  (Saponaro et al., 2017; Jia et al., 2019a). Even though few studies have explicitly accounted for this by combining simultaneous precipitation observations from active remote sensing (Chen et al., 2014), how different treatments could influence the assessment of ~~the Twomey effect remains~~ 85 unclear, which  $S$  remains unclear. Solving this problem is helpful to reconcile the current diverse ACI estimates in order to achieve a more confident observational constraint.

For the satellite-based investigations, it is crucial but difficult to disentangle any physically meaningful attributable factors from artificial aerosol-cloud linkage induced by retrieval biases. In terms of  $N_d$ , retrievals for 3-D-shaped clouds and partially

cloudy pixels deviate from the retrieval assumptions of overcast homogenous cloud and 1-D plane-parallel radiative transfer, thereby appear to lead to an overestimation of CER (Coakley et al., 2005; Matheson et al., 2006; Zhang and Platnick, 2011) (Coakley et al., 2005; Matheson et al., 2006; Zhang and Platnick, 2011; Zhao et al., 2012), in turn, an underestimated  $N_d$  (Grosvenor et al., 2018). This issue was reported to be more pronounced for broken cloud regimes, and could to some extent be addressed by only sampling  $N_d$  for pixels with either high cloud fraction (Painemal et al., 2020) or large cloud optical depth (COT; Zhu et al., 2018). In addition to the assumptions on clouds, the existence of aerosols above clouds can also affect the retrieval of cloud optical depth (Haywood et al., 2004; Li et al., 2014), in turn bias  $N_d$  calculation. Meanwhile, the retrieved AOD or aerosol index (AI) can be biased to a larger value due to the inability to detect thin clouds in an aerosol-retrieval scene (Kaufman et al., 2005) or due to enhanced reflectance from neighbouring clouds (Várnai and Marshak, 2009). It is noteworthy that the overestimation of AOD tends to enhance with increasing cloud fraction (Zhang et al., 2005) and COT (Várnai and Marshak, 2021) as a result of both retrieval problems and aerosol swelling (Quaas et al., 2010). Therefore, the potential covariations between biases in  $N_d$  and AOD (AI) modulated by cloud macrophysical properties could incur a spurious correlation between the two variables, obscuring the causal interpretation. While a few studies pointed out that the AOD(AI)- $N_d$  correlation is substantially enhanced when analyzing reliable  $N_d$  retrievals (Jia et al., 2019a; Painemal et al., 2020), how and to which extent the satellite-diagnosed ~~Twomey effect~~  $S$  varies with the retrieval biases in terms of both aerosol and  $N_d$ , respectively, has not been fully understood. Such understanding is quite important for reconciling the previous estimates and proposing a meaningful method applicable to satellite-based investigations.

While the problem of vertical co-location between retrieved CCN proxy and clouds has been noticed in many previous studies, most of them placed focus on its influence on the correlation between aerosol and cloud (Stier, 2016; Painemal et al., 2020), i.e., a much higher correlation between  $N_d$  and aerosol extinction coefficients near cloud base compared to  $N_d$  vs. column-integrated aerosol quantity (AOD/AI), rather than the influence on  $S$ . The later is usually quantified as regression coefficient (regression slope in log-log space) between  $N_d$  and CCN proxy and is a key determinant of radiative forcing estimates. Using AI as a CCN proxy, Costantino and Bréon (2010) demonstrated a weaker cloud susceptibility for the case with separated aerosol-cloud layers than well-mixed ones. However, it is unclear how the  $S$  would change when switching commonly used column aerosol quantities to aerosol measures at cloud base. This understanding is particularly important for the inter-comparison and further reconciliation between current ACI metrics relying on diverse CCN proxies, including column-integrated, near-surface, and cloud level aerosol quantities.

In this study, we focus on the quantification of the impacts of three major confounders mentioned above, namely updraft, precipitation, and retrieval errors, as well as the problem of vertical co-location between aerosol and cloud, on the assessment of ~~the Twomey effect~~  $S$  in the context of marine warm clouds by combining multiple active/passive satellite sensors and reanalysis products. On the basis on current findings, this study further suggests several potential ways forward to account for, to the extent possible, the major influencing factors practically for the satellite-based quantification of ~~the Twomey effect~~  $S$ , hence the  $ERF_{aci}$ .

## 2 Data and method

This work is based on observational data from multiple instruments on board Terra, Aqua and CloudSat platforms as well as reanalysis data from the Modern-Era Retrospective analysis for Research and Applications, version 2 (MERRA-2) ~~product~~ (Randles et al., 2017) (Randles et al., 2017) and the European Centre for Medium-Range Weather Forecasts (ECMWF) Reanalysis v5 (ERA5) (Hersbach et al., 2020). Table 1 summarizes the aerosol, cloud, and precipitation parameters and their corresponding sources, temporal-spatial resolutions, and time periods analyzed in the present study. Note that due to the requirement for co-located aerosol-cloud-precipitation observations, the data used in section 3.2 are obtained from the A-Train constellation of satellites (Aqua and CloudSat), which are then interpolated to  $5 \times 5 \text{ km}^2$  resolution for analysis, while the remaining parts are based on the observations from Terra, where all data are interpolated to  $1^\circ \times 1^\circ$  resolution. The combination of datasets used in each section is summarized in Table 2. It is worth mentioning that, as  $S$  was found to vary with the spatial resolution of data (Sekiguchi et al., 2003; McComiskey and Feingold, 2012), the different data resolutions between section 3.2 and other sections can lead to a difference in  $S$ ; but this is not the focus here. This study is restricted to global ocean with latitude between  $60^\circ\text{S}$  and  $60^\circ\text{N}$  because of limited quality of retrievals of aerosol size parameters (Levy et al., 2013) and  $N_d$  (Gryspeerdt et al., 2021) over land and polar regions.

Aerosol properties (Levy et al., 2013) are ~~basically~~ obtained from the level 3 Moderate Resolution Imaging Spectroradiometer (MODIS) Dark Target product (MOD08 and MYD08; Platnick et al., 2017b). In order to collect co-located (adjacent) aerosol and cloud retrievals for analysis, aerosol retrievals on a coarse-resolved grid ( $1^\circ \times 1^\circ$  on a latitude-longitude grid) are used to match cloud pixels ( $5 \times 5 \text{ km}^2$ ), assuming that aerosols properties in adjacent clear areas are representative of those under cloudy conditions (Anderson et al., 2003; Quaas et al., 2008). In addition to commonly used AOD, aerosol index (AI = AOD  $\times$  Ångström exponent) containing the information of aerosol size, is also employed since it is considered as a better proxy for CCN (Nakajima et al., 2001). The Ångström exponent is calculated from AOD at wavelengths of 460 and 660 nm. To eliminate  $1^\circ$  by  $1^\circ$  scenes where the aerosol distribution is heterogeneous, retrievals with a standard deviation higher than the mean values are discarded ~~-In addition~~(Saponaro et al., 2017). As suggested by Hasekamp et al. (2019), the lowest 15 % of data for AOD (AI) at a global scale are excluded to avoid large retrieval uncertainty at low aerosol concentrations (Ma et al., 2018a). Note that leaving out the low AOD (AI) yields a larger  $S$  compared to using all data (Hasekamp et al., 2019).

Cloud optical properties, including CER and COT at  $3.7 \mu\text{m}$  (Platnick et al., 2017c), are obtained from the MODIS level 2 cloud products (MOD06 and MYD06; Platnick et al., 2017a), and then applied to compute  $N_d$  based on the adiabatic approximation (Quaas et al., 2006). It was found that the filtering of cloud adiabaticity only has a negligible impact on the estimate of  $S$  since  $N_d$  is the independent variable in the  $S$  calculation, but in turn results in a reduction of up to 63 % in the data volume (Gryspeerdt et al., 2021). For this reason, we do not apply such filtering here. Note that  $N_d$  is calculated on the level of the satellite pixel (order 1 km) before aggregated to larger scales. Thus, the aggregation bias caused by the derivation of  $N_d$  from the highly non-linear function of CER and COT as shown by (Feingold et al., 2021) Feingold et al. (2021), does not affect the results presented here. To ensure confident retrievals, the  $N_d$  is filtered to include only single-layer liquid clouds with top temperature higher than 268 K. Pixels where CER  $< 4 \mu\text{m}$  and COT  $< 4$  are discarded due to the large uncertainty of retrievals

(Sourdeval et al., 2016). In addition, only pixels with cloud fraction at 5 km resolution ( $CF_{5 \times 5 \text{ km}^2}$ ) > 0.9, and with a sub-pixel inhomogeneity index (cloud\_mask\_SPI) < 30 are used to reduce the retrieval errors induced by cloud edges and broken clouds (Zhang and Platnick, 2011). Further, we only consider pixels with a solar zenith angle of less than 65° and a sensor zenith angle of less than 41.4° to minimize the influence of known biases as detailed in Grosvenor et al. (2018).

160 To overcome the lack of the global updraft observation, we utilize satellite-based retrievals for CBH ~~and as a proxy of cloud~~  
base updraft for cumuliform clouds, based on the finding that these two quantities exhibit an approximately linear correlation  
for convective clouds (Zheng and Rosenfeld, 2015). Here, clouds are considered convective for low troposphere static stability  
(LTS) less than 16 K (Rosenfeld et al., 2019). Additionally, cloud geometrical thickness (CGT) ~~as proxies; the difference~~  
between cloud top height and CBH is used as an alternative proxy for the updraft regardless cloud types, since it has been  
165 observed to be associated with the cloud-base updraft for shallow cumuliform clouds (Lareau et al., 2018) and also correlated  
with cloud-base updraft for stratiform clouds via modulating cloud top cooling (Zheng et al., 2016). To obtain CBH and ~~cloud~~  
top height (CTH) CGT, we apply a recently developed retrieval algorithm (0.25° × 0.25° resolution, Böhm et al., 2019) based  
on Multi-angle Imaging SpectroRadiometer (MISR)/Terra observations, i.e. the MISR Level 2 Cloud Product (MIL2TCSP;  
NASA/LARC/SD/ASDC, 2012). ~~While CBH is applied here as a proxy for vertical velocity at cloud base, CGT derived as the~~  
170 ~~difference between CTH and CBH is utilized as as an alternative proxy for in-cloud vertical velocity~~The best performance of  
this algorithm is achieved for clouds with CBH around 1 km and CGT below 1 km. For such heights, which are characteristic  
for oceanic clouds considered in this analysis, the root mean square error ranges between 300–350 m. It is important to note  
that the MISR cloud-base height retrieval is limited to CBH > 560 m (Böhm et al., 2019). At this lower end of the detection  
range, a slight underestimation of the CBH is expected (Böhm et al., 2019). The ERA5 reanalysis is employed here to calculate  
175 LTS, as the difference in potential temperature between 700 and 1000 hPa (Klein and Hartmann, 1993). The hourly LTS is then  
matched to 10:30 local solar time to approximate the overpass time of the Terra satellite.

To identify the role of precipitation, CloudSat radar precipitation observations co-located with AOD/AI and  $N_d$  from MOD-  
IS/Aqua are adopted as well. Here, we use the precipitation flag from the 2B-CLDCLASS product (Sassen and Wang, 2008) to  
distinguish precipitating (with the flags of ‘liquid precipitation’ and ‘possible drizzle’) and non-precipitation clouds (with the  
180 flag of ‘no precipitation’). As a sink of  $N_d$ , drizzle could also affect the aerosol-cloud interactions even without rain falling on  
ground (Yang et al., 2021), so we also include drizzling clouds into precipitating cases. The CloudSat data at a  $1.4 \times 2.5 \text{ km}^2$   
resolution are matched to the nearest MYD06 ~~5-km-5 × 5 km<sup>2</sup>~~ pixels for further analyses.

The MERRA-2 product assimilates observations of the atmospheric state as well as remotely sensed AOD so that it can gener-  
ate reasonable aerosol horizontal and vertical distributions (Buchard et al., 2017). The use of aerosol reanalysis also largely  
185 avoids the spuriously high AOD near clouds caused by the retrieval artifacts from satellite (Jia et al., 2021). ~~Here, we~~ Given that  
variability in sulfate aerosols contributes the most strongly to variability in  $N_d$  among all aerosol species (McCoy et al., 2017)  
, the sulfate concentration is considered be to the CCN proxy here. We utilize vertically resolved sulfate mass concentrations  
from MERRA-2 reanalysis in combination with the MISR CBH retrieval to obtain sulfate mass concentrations near cloud base  
(SO4B). In addition, sulfate surface mass concentrations (SO4S) and column mass density (SO4C) are also used to investigate

190 if there will be different behaviors of  $N_d$ -to-CCN sensitivity when applying CCN proxies at different levels. The MERRA-2 3-hour averaged fields are interpolated to 10:30 local solar time to approximate the overpass time of the Terra satellite.

Figure 1 illustrates the regression procedure for calculating the ~~sensitivity of  $N_d$  to CCN proxy~~. After excluding the lowest 15 % AOD (AI), the data are then divided into 20 bins of CCN proxy, where each bin has an equal number of samples. The same number of samples ensures the same statistical representativeness within each bin. The values of  $N_d$  and CCN proxy to a certain bin are the medians of all values in that bin. The generated 20 paired values of  $N_d$  and CCN proxy are then used in linear regression to determine  $S$  unless otherwise stated. The uncertainties of estimated  $S$  is reflected by the 95 % confidence interval of the regression slope. We also tried 100 and 1000 bins, and found that the derived ~~sensitivities susceptibilities~~ do not change significantly with number of bins. Additionally, the linear regression on all data points is also shown (~~white-yellow~~ dashed line) in Fig. 1 for comparison with the pre-binned approach. ~~Since the median is more robust regarding outliers (e.g. heavy aerosol load associated with low  $N_d$ ) giving outliers less weight, the binned approach is preferable to avoid unnecessary complications, since both approaches have been used extensively by previous studies (Quaas et al., 2008; Gryspeerdt et al., 2017; Hasekamp et al., 2019; Rosenfeld et al., 2019) but it is unclear yet how large the difference in estimates between two approaches could be.~~ Figure 1 ~~shows that the binned~~ illustrates that the pre-binned approach has a larger slope than lumping together all data points by 18 %, suggesting that attention should be paid when comparing  $S$  derived from different approaches. In our study, both approaches lead to similar conclusions, as such, we will only focus on the results from pre-binned approach in the main text. Meanwhile, we also put the results associated with all-data approach to Supplementary Materials.

200

205

### 3 Results

#### 3.1 Dependence on updraft

210 In adiabatic clouds,  $N_d$  is essentially a function of both CCN and updraft (Feingold et al., 2001). To quantify how  $N_d$  responds to CCN perturbations, the variation of updraft must be constrained. In a practical term, however, the observation of in-cloud vertical velocity is possible only from in-situ aircraft measurements or ground-based remote sensing, limiting the estimations to individual locations and sites. In order to obtain  $S$  at a global scale, only possible from satellite, meteorological parameters (Ma et al., 2018b) or cloud regimes (Gryspeerdt and Stier, 2012) were generally employed to roughly approximate cloud dynamics. However, it should be noted that even in similar meteorological backgrounds and cloud regimes, the vertical velocity within individual clouds can still vary significantly (Hudson and Noble, 2014). Instead, based on previous findings from in-situ observations (see the section "Data and Methods"), our study utilizes CBH as a proxy of cloud base updraft ~~based on the finding that these two quantities exhibit an approximate linear correlation, at least for convective clouds (Zheng and Rosenfeld, 2015)~~. Additionally, CGT is also used here to denote the averaged upward motion throughout a cloud, as CCN activation is not fully ~~limited to cloud base for convective clouds, in some situations it could also occur above cloud base in case the large vertical velocity exists there (Slawinska et al., 2012)~~ for cumuliform clouds and CGT as a proxy for the updraft regardless cloud types. Note that with similar cloud top heights, the higher cloud base means thinner cloud layer. To avoid the potential interference

215

220

by CGT, the analysis of the dependence of  $S$  on CBH (Fig. 2a) is conducted within a quasi-constant CGT bin of 650–750 m. This range is chosen because of its relatively strong  $S$ , low possibility of precipitation as well as sufficient data points (Fig. 2b).

225 Figure 2 shows the dependence of linear regression slopes of  $\ln N_d$  versus  $\ln$  AOD ( $\ln$  AI), i.e.,  $S_{\text{AOD}}$  ( $S_{\text{AI}}$ ), on CBH and CGT, respectively. To constrain the variation of cloud dynamics, the data are grouped over CBH and CGT bins with intervals of 80 and 100 m, respectively. It is ~~clear-seen~~ that  $S_{\text{AOD}}$  and  $S_{\text{AI}}$  exhibit ~~evident~~ increases with both CBH and CGT, consistent with the expectation of stronger aerosol-cloud interactions under larger in-cloud vertical velocity conditions. The result is in accord with previous findings based on surface remote sensing under stratus (McComiskey et al., 2009) and altocumulus  
230 clouds (Schmidt et al., 2015). Also, using ground-based observations, Feingold et al. (2003) quantified this linkage and gave a correlation of 0.67 between  $S$  and column maximum updraft. In our study, the correlation coefficients are ~~0.95 (0.90)~~ 0.83 (0.98) for CBH– $S_{\text{AOD}}$  ( $S_{\text{AI}}$ ) and ~~0.95 (0.96)~~ (0.95) for CGT– $S_{\text{AOD}}$  ( $S_{\text{AI}}$ ). The higher correlations likely stem from the large volume of data used to stratify CBH(CGT), which enhances the representability of samples from a statistical perspective compared to the more limited number of cases used in Feingold et al. (2003).

235 It is also noted that, unlike the monotonic increase with CBH,  $S_{\text{AOD}}$  ( $S_{\text{AI}}$ ) increases ~~remarkably~~ with CGT at small-to-moderate CGT range ( $< 900$  m) and then levels off (Fig. 2b). This is likely due to the tighter linkage between the occurrence of precipitation and CGT than CBH. Specifically, larger CGT is an indicator of strong updraft, tending to generate larger  $S_{\text{AOD}}$  ( $S_{\text{AI}}$ ), whereas at the meantime it is also associated with the higher possibility of precipitation, which acts as an efficient sink of droplets (see section 3.2), thereby partly offsets the increase of  $N_d$  induced by CCN, i.e., smaller  $S_{\text{AOD}}$  ( $S_{\text{AI}}$ ). In  
240 short, the situation of  $S_{\text{AOD}}$  ( $S_{\text{AI}}$ ) at larger CGT (Fig. 2b) is a result of the competition between the effects of updraft and precipitation. Comparing the different CCN proxies, we see that in agreement with previous results (Hasekamp et al., 2019),  $S_{\text{AI}}$  is consistently higher than  $S_{\text{AOD}}$  for both all data cases (dashed lines) and ~~each-almost all~~ CBH (CGT) ~~bins except for~~ CGT  $> 900$  m. For the remainder of the paper, only AI that is a better CCN proxy is used unless otherwise stated.

To gain insight into the mechanism underlying the apparent dependence of ~~the Twomey effect on CBH (CGT)~~  $S$  on updraft, we contrast AI– $N_d$  (CER) joint histograms for weak and strong updraft conditions (Fig. 3). As the data volume for CBH case is too small to populate the joint histogram, only the CGT-related result is shown. Here, the subsets of data with ~~CBH (CGT)~~ CGT lower than the 25th percentile and higher than the 75th percentile are defined as weak and strong updrafts, respectively. Note that applying the 10th and 90th percentiles also yields similar results as shown in Fig. S2. It is known that the aerosol– $N_d$  relationship is nonlinear and, particularly, regime dependent (~~Reutter et al., 2009~~). ~~They~~, Reutter et al. (2009)  
250 proposed three distinct regimes according to the ratio of vertical velocity and aerosol concentration: a) aerosol-limited regime, being characterized by high ratio value, nearly linear dependence of  $N_d$  on aerosol, and insensitivity of  $N_d$  to updraft, b) updraft-limited regime, being characterized by low ratio value and weak dependence of  $N_d$  on aerosol but quite strong dependence on updraft, and c) transitional regime, falling between the above two regimes. Since we have limited the proxy of updraft (~~CBH~~ CGT) to a certain range, AI is thus assumed as an indicator of regime. Specifically, the low AI zone is more likely aerosol-  
255 limited while the high AI zone is close to updraft-limited regime. As illustrated in the difference plots in Fig. 3, under the polluted condition with  $\text{AI} > 0.4$ , the samples of the strong updraft case tend to concentrate in the larger  $N_d$  bins compared to the weak updraft (Fig. 3c, ~~i~~), reflecting the critical role of updraft on facilitating activation of cloud droplets. Nevertheless, the

distributions of CER do not exhibit systematic difference, except for less scattering for the strong updraft (Fig. 3f,i). As for the clean condition, what should be expected is the similar distribution of  $N_d$  between different cloud dynamics as determined by the nature of aerosol-limited regime, or at least a slightly higher  $N_d$  for the strong updraft case. However, looking at the clean zone ( $AI < 0.15$ ) in Fig. 3, it is clear that the strong updraft is associated with much lower  $N_d$  as well as larger CER (generally larger than  $14 \mu\text{m}$ , the threshold for drizzle initiation suggested by Freud and Rosenfeld (2012)) compared to the weak updraft, indicating a higher possibility of precipitation and/or drizzle. Consequently, the strong sink of droplets via precipitation at low AI and the enhanced activation of droplets at high AI will jointly create a much larger regression slope of  $\ln N_d$  versus  $\ln AI$  for the strong updraft compared to the weak updraft condition. Moreover, these results also imply that the interference of precipitation tends to amplify realistic dependence of  $S_{AI}$  on the updraft, highlighting the need to remove the influence of precipitation on  $N_d$  budget.

### 3.2 Dependence on precipitation

In this section, the role of precipitation on the quantification of ~~the Twomey effect~~ will be explicitly accounted for by using the simultaneous aerosol-cloud-precipitation observations from CloudSat-MODIS combined datasets (see section 2). The hypothesis is that for precipitating clouds, a sink to  $N_d$  exists (via the coagulation) that is not reflecting the Twomey effect, so that the  $CCN - N_d$  relationship is biased low in cases of precipitation formation. Figure 4 shows the  $AI - N_d$  joint histograms for non-raining, raining and all clouds as well as the difference between non-raining and raining cases. ~~As expected, the~~ The raining clouds exhibit a ~~much~~ lower  $N_d$  relative to non-raining clouds over all AI bins, caused by the intensive sink of cloud droplets by collision-coalescence when precipitation forms (Fig. 4b,c,d). In addition, as the droplet sink and aerosol removal by precipitation can act together to veil the actual effect of aerosol on  $N_d$ , the  $N_d$  in raining clouds shows a weaker response to increasing AI than that in non-raining clouds, with the corresponding  $S_{AI}$  of 0.45 versus 0.56, respectively. The result is in agreement with Chen et al. (2014), who reported a consistently smaller CER-to-AI sensitivity in precipitating case than in non-precipitating case throughout different environmental conditions.

Interestingly, the regression slope of  ~~$\ln(AI)$  versus  $\ln(N_d)$~~   $\ln(AI)$  versus  $\ln(N_d)$  ~~is evidently~~ is enhanced after lumping all cloud scenes together regardless of whether it rains or not (Fig. 4a). The corresponding  $S_{AI}$  (0.68) increases by 21 % relative to the non-raining case (0.56). This phenomenon was also noted by Painemal et al. (2020), and they speculated that drizzle appears to strengthen the aerosol- $N_d$  relationship, which is, however, contrary to the ~~obviously~~ weaker  $S_{AI}$  for raining clouds as illustrated above. For a clearer comparison of the  $S_{AI}$  for non-raining, raining and all clouds, the fitting lines for these three cases are put into one single plot (Fig. 4e), with clean and polluted zones marked as blue and red, and the corresponding sample distributions are presented in Fig. 4f,g. It is ~~clearly~~ clearly shown that, the fitting line for all clouds nearly coincides with that for the non-raining case under polluted conditions, but closer to the raining case under clean conditions (Fig. 4e), consequently leading to a much steeper slope. This behavior is further corroborated by the ~~difference~~ different distributions of  $N_d$  ~~distributions, i.e.~~ distributions, i.e. As shown in Fig 4g, the polluted clouds consist predominately of the non-raining clouds as a result of the suppression of precipitation by aerosols (Fig. 4g), thus maintaining a high value of  $N_d$ , ~~while~~ Instead, the majority of the clean clouds are raining ones that are significantly subjected to the sink processes for  $N_d$  and/or aerosol scavenging (Boucher and Quaas, 2013) (Fig. 4f), hence

corresponding to a lower  $N_d$ . The results presented here imply that introducing the dependence of possibility of precipitation on aerosols (i.e., cloud lifetime effect) into the estimation of [the Twomey effect](#), as commonly done in most previous studies, would perturb the statistical analysis and artificially bias the strength of the Twomey effect to a higher value. Moreover, it should be noted that a more extensive zone with  $N_d$  being insensitive to aerosol is evident under low aerosol conditions after raining clouds being included (Fig. 4a), which means that, in addition to the overestimation of regression slope, the interference of precipitation also gives rise to an apparent non-linearity of the aerosol- $N_d$  relationship, hence adding substantial complexity in quantifying [Twomey effect  \$S\$](#)  using a linear regression (Gryspeerd et al., 2017).

### 3.3 Dependence on retrieval biases in AOD (AI) and $N_d$

~~Satellite retrieval errors in aerosol and cloud properties, and sampling biases~~ Both aerosol retrievals errors due to 3D radiative effects, cloud contamination, and aerosol swelling, and cloud retrieval errors for 3-D-shaped and heterogeneous clouds, have been shown to artificially introduce biases in the estimation of [the Twomey effect \(Jia et al., 2019a, 2021\)](#), but the understanding aerosol-cloud interactions (Quaas et al., 2010; Christensen et al., 2017; Neubauer et al., 2017; Jia et al., 2019a, 2021). Here, we dig deeper on how  $S$  ~~varies with retrieval errors due to~~ as a function of retrieval errors by defining two metrics that characterize the retrieval biases quantitatively. In order to obtain horizontally 'co-located' aerosol-cloud retrievals for analysis, the often adopted choice is a  $1^\circ$  by  $1^\circ$  gridding scale, at which aerosol concentrations are considered homogeneous (Anderson et al., 2003). Within a  $1^\circ$  by  $1^\circ$  grid box, sub-grid clear-sky and cloudy pixels co-exist (if clouds are not fully overcast) and are used for retrieving cloud and aerosol properties, respectively. However, in case that most of clear-sky pixels are close to clouds, the problems of 3D radiative effects, aerosol swelling, and cloud detection issues (e.g. Quaas et al., 2010) is lacking. Here, we define two metrics in order to characterize some of the known retrieval biases quantitatively. In terms of aerosol retrieval radiative effects, cloud contamination, and aerosol swelling arise. Thus, the metric ~~is the~~ of aerosol retrieval errors (including 3D radiative effects, cloud contamination, and aerosol swelling) is defined as the average distance to nearest cloudy pixel from clear pixels for aerosol retrieval ( $\Delta L$ ) ~~as the aerosol retrieval gets unreliable in cloudy environment~~, which is provided directly by MODIS L3 aerosol product. As for the cloud retrieval, the metric is the difference between  $N_d$  retrieved from all cloudy pixels sub-pixels ( $N_{dAll}$ , without the cloud screening on CER, COT,  $CF_{5 \times 5 km^2}$  and sub-pixel inhomogeneity index) and that retrieved from sub-pixels only with favorable situations for reliable cloud retrieval (see Methods for details), which is tightly related to the degree of cloud inhomogeneity. Generally, a negative value of heterogeneity. Note that  $N_{dAll}$  and  $N_d$  are concurrently calculated for each  $1^\circ$  by  $1^\circ$  cloud scene, thus  $\Delta N_d$  ( $N_{dAll} - N_d$ ) only reflects the role of retrieval errors, with other conditions held constant (e.g., cloud types and meteorology). Generally, a negative value of  $\Delta N_d$  is expected since a positive bias in CER and a negative bias in COT for spatially inhomogeneous scenes act together to generate negatively biased  $N_{dAll}$  according to the Equation 1 in Quaas et al. (2006). In this section, we also look at AOD in addition to AI, since AOD is a directly retrieved quantity and thus more closely related to retrieval problems.

Figure 5a shows the dependences of both AOD (AI) and linear regression slopes of  $\ln N_d$  ( $N_{dAll}$ ) versus  $\ln$  AOD ( $\ln$  AI) on  $\Delta L$ . We note that AOD (AI) is the largest for the first  $\Delta L$  bin with a value of 0.24 (0.17), and then drops rapidly to around 0.16 (0.13) for the other distances from clouds, indicating a quite strong near-cloud enhancement of AOD (AI) induced by



either retrieval bias or aerosol swelling. As AE was found to increase with  $\Delta L$  (Várnai and Marshak, 2015), the reduction of AI with  $\Delta L$  is thus less strong than AOD. Correspondingly,  $S_{\text{AOD}}$  and  $S_{\text{AI}}$  for the first  $\Delta L$  bin are quite low relative to other bins, especially for AOD, suggesting that the retrieval bias in aerosol near clouds could result in a severe underestimation in ~~the Twomey effect~~. These results imply that screening out the aerosol retrievals within the first  $\Delta L$  bin (i.e., the average  
330 distance to the nearest cloud pixel less than 10 km) could be an applicable approach to sidestep the interference of aerosol retrieval biases. It is also noted that  $S_{\text{AOD}}$  ( $S_{\text{AI}}$ ) shows an increase first and then a decrease from the ~~second-third~~  $\Delta L$  bin; ~~this cannot be, however, interpreted as~~. ~~However, the following decrease is unlikely linked to~~ the aerosol retrieval bias ~~due to the unchanged~~ since the AOD (AI) ~~(remains almost constant (the upper panel in Fig. 5a), but~~. ~~One interpretation for this would be that AOD/AI is getting less representative for the aerosol concentrations near cloud with increasing  $\Delta L$ , especially~~  
335 ~~for grid-boxes with precipitation where aerosol is not as homogeneous as assumed (Anderson et al., 2003). Moreover, as  $\Delta L$  is also negatively correlated with CF (Várnai and Marshak, 2015), the decreasing  $S_{\text{AOD}}$  ( $S_{\text{AI}}$ ) is probably associated to other factors modulated by CF (such as retrieval error in  $N_d$  as demonstrated in the following analysis) ~~as  $\Delta L$  is negatively correlated with CF (Várnai and Marshak, 2015), and/or the fact that AOD/AI is not as representative for the  $N_d$  near cloud anymore, especially for precipitating pixels where aerosol is not as homogeneous as assumed.~~~~

340 Interestingly, Fig. 5a also depicts that the  $S_{\text{AOD}}$  ( $S_{\text{AI}}$ ) calculated from  $N_{d\text{All}}$  is consistently lower than that from  $N_d$  for each  $\Delta L$  bin, indicating that the cloud retrieval biases for partly cloudy pixels ~~appears~~ ~~appear~~ to lead to an underestimation of ~~the Twomey effect~~. The increase of the difference between them with  $\Delta L$  reveals that more ~~serious~~ underestimation occurs for high  $\Delta L$  (typically low CF) conditions, where clouds are more partially cloudy ~~and 3-D-shaped~~, thereby deviate from the retrieval assumptions of overcast ~~homogenous cloud and 1-D plane-parallel radiative transfer~~ ~~homogeneous cloud~~. As aforementioned,  $\Delta N_d$  can act as a measure of some of the retrieval errors in cloud; the more negative  $\Delta N_d$ , the larger retrieval error in  $N_d$ . As shown in Fig. 5b, the  $S_{\text{AOD}}$  ( $S_{\text{AI}}$ ) calculated from  $N_{d\text{All}}$  increases ~~sharply~~ with  $\Delta N_d$ , and then reaches its maximum when  $\Delta N_d$  approaches 0, demonstrating that the satellite-diagnosed ~~Twomey effect~~ ~~S~~ highly depends on the retrieval bias in cloud. In terms of the quality-assured  $N_d$ , the corresponding  $S_{\text{AOD}}$  ( $S_{\text{AI}}$ ) is not anticipated to be affected by retrieval issues, thus independent on  $\Delta N_d$ , but it is obviously not the case; the  $S_{\text{AOD}}$  ( $S_{\text{AI}}$ ) also significantly increases with  $\Delta N_d$ , which means  
345 that the criteria used for selecting homogeneous clouds within a 5 km  $\times$  5 km grid would not be as sufficient for an optimal performance of retrieval (Grosvenor et al., 2018) as we thought.

Figure 6 depicts relationships between  $\Delta L$  and  $\Delta N_d$ , where the data are grouped as a function of CF for 50 cloud fraction bins containing same number of samples. It is clearly illustrated that CF regulates the negative correlation between  $\Delta L$  and  $\Delta N_d$ . ~~Under the condition of large CF, clear pixels are very close to the nearest cloud pixel, corresponding to a lower  $\Delta L$ , meanwhile, most of sub-grid cloud pixels meet the criteria for confident cloud retrievals, leading to a higher (near-zero)  $\Delta N_d$ ; and the reverse is true in the case of low CF.~~ This means that it is practically difficult to balance the accuracies of retrievals on both aerosol and cloud, since the aerosol retrieval should stay away from clouds, requiring low CF, whereas the  $N_d$  retrieval should be performed in more homogeneous clouds (high CF) in order to satisfy the retrieval assumption of 1-D plane-parallel radiative transfer. To avoid the spuriously high AOD (AI) retrieval near clouds, the use of aerosol reanalysis would be a way  
350 forward (Jia et al., 2021). In terms of  $N_d$ , however, the situation is more complicated. Given that CF also correlates closely

with cloud dynamics (CGT; Fig. 6), it does not make sense to simply restrict the analysis to low  $\Delta N_d$  (thus high CF) to reduce the retrieval uncertainty of  $N_d$ ; in doing so, a selection of cloud regime could be artificially applied.

### 3.4 Dependence on vertical co-location between aerosol and cloud

Currently, the use of reanalyzed/modeled aerosol vertical profiles seems the only feasible alternative to exploit the problem of vertical co-location since it is impossible yet to obtain aerosol retrievals below or within clouds from satellite (Stier, 2016; McCoy et al., 2017). Thus, unlike the previous sections based on satellite retrieved AOD/AI, vertically resolved SO4 from the MERRA-2 reanalysis is utilized here to obtain the CCN proxies for different altitudes. ~~The Although not as commonly adopted as AOD/AI, SO4C and SO4S were also used as CCN proxies by previous studies (McCoy et al., 2017; Jia et al., 2021). Here, the SO4C and SO4S are used, respectively, to mimic the behaviors of AOD/AI and surface aerosol extinction coefficient, which are commonly used as that are two commonly used CCN proxies in the satellite-based and ground-based methods (Quaas et al., 2008; Liu and Li, 2018), respectively. The SO4B, As demonstrated by Stier (2016), the SO4B derived in combination with CBH, is considered expected to be more relevant to the amount of CCNs actually activated at cloud base than SO4C and SO4S. The comparison of the Twomey effect susceptibilities inferred from these three proxies helps to understand whether the uses of column-integrated and near-surface aerosol quantities make sense, and more importantly, to reconcile the large range of existing estimates of the Twomey effect from different observational methods.~~

Figure 7 shows the two-dimensional probability density functions of  $\ln(N_d)$  and  $\ln(\text{SO4})$  along with fitting lines. We note that the ~~pre-binned~~ pre-binned method yields similar high correlation coefficients ( $R$ ) for SO4B (0.96), SO4S (0.95), and SO4C (0.98) due to the data stratification. When moving to the regression on all data points (Table S1), we can see that the  $R$  for SO4B is the highest (0.6), followed by SO4S (0.57), and the  $R$  for SO4C is the lowest (0.54), consistent with the results reported by (Stier, 2016) and (Painemal et al., 2020). In contrast, the regression slopes for SO4C (0.88) are, however, nearly twice as large as that for SO4B (0.47) and SO4S (0.46) (Fig. 7), implying that the strength of ~~the Twomey effect  $S$~~  derived on a basis of column-integrated aerosol quantity, which is often the case for most previous satellite-based estimates, is overestimated by nearly a factor of two. Note that to explain the same change in  $\ln(N_d)$ ,  $\ln(\text{SO4B})$  and  $\ln(\text{SO4S})$  increase by about 5, while  $\ln(\text{SO4C})$  only increases by 2 (Fig. 7). Translating to the linear scale, this means that SO4B (SO4S) increases by 148-fold, whereas only a tenfold increase can be seen in SO4C, resulting in the much larger slope of  $\ln(N_d)$  versus  $\ln(\text{SO4C})$ . The underlying reason would be that the variability of SO4C is insufficient to explain the variabilities of SO4B (SO4S).

In order to verify whether SO4C has the capability to capture the variability of SO4B quantitatively, the coefficient of variation (CV; calculated as the ratio of the standard deviation to the mean) is employed, which is a measure of relative variability, and particularly useful for the comparison among quantities with different magnitudes and units, e.g., SO4C (in units of  $\mu\text{g m}^{-2}$ ) versus SO4B or SO4S (in units of  $\mu\text{g m}^{-3}$ ) here. Since ~~the Twomey effect  $S$~~  is generally inferred from the spatiotemporal variability of aerosol and cloud properties, here we calculate the temporal and spatial CVs, respectively; the temporal CV is calculated from the daily time series for the period 2006–2009 for each  $1^\circ \times 1^\circ$  grid box, and the spatial CV is derived from the multi-annual averaged global geographical distribution. As shown in Fig. 8a,b,c, the temporal CVs of SO4C

395 are ~~much~~ smaller than those of SO4B and SO4S almost everywhere, with globally averaged CVs of 0.52 versus 1.02 and 1.03. Spatially, the larger CVs are generally located over the aerosol outflow regions, such as the western North Pacific and the Atlantic, and the east coasts of south America and South Africa, indicative of an impact of the strong variation of continental, and specifically anthropogenic emissions. Similarly, the spatial CV of SO4C exhibits a much smaller (0.88) value than those of SO4B and SO4S (1.84 and 1.79). In other words, the variability of SO4C is only able to reflect about half of the variability of SO4 near cloud base. This is mainly due to the important role of SO4 above cloud in total column SO4. However, above-cloud aerosol is much more homogeneous compared to SO4B and SO4S that are directly driven by rapid change of anthropogenic emissions near surface.

This is demonstrated in Fig. 8d, which shows that the ratio of SO4C below cloud (SO4BC) to SO4C is quite low, with a global average of 11.89 %. Spatially, the ratio can be up to 35 % over aerosol outflow regions, but generally below 10 % over vast remote oceans. The low ratio confirms the comparatively small sub-cloud aerosols in determining the aerosol loading within a column. Interestingly, there is also a good consistency between the spatial patterns of the ratio of SO4BC to SO4C and the correlation coefficient of SO4C with SO4B (Fig. 8d,e), i.e., ~~loose correlations ( $R < 0.3$ ) over the regions with low ratio, while there are strong relations~~ the high-ratio regions (the ratio > 15 %) generally have strong correlations ( $R > 0.7$ ) over the high-ratio regions. Therefore, with regard to the vertical co-location, it is comparatively sensible to use column-integrated quantities such as AOD/AI to represent CCN near cloud base over polluted continents and its immediate outflow region, where the correlation coefficient of SO4C with SO4B are overall larger than 0.7, but this is obviously not the case over remote oceans. The loose correlation between cloud-base and column-integrated aerosols found here ( $R < 0.4$ ), in combination with the detectability limitations of satellite instrument on aerosol loading (Ma et al., 2018a), makes it more challenging to detect any meaningful aerosol-cloud associations in pristine environments from retrieved AOD/AI. Nevertheless, unlike the SO4C, rather strong correlations between SO4S and SO4B ( $R > 0.7$ ) can be generally found with the only exception of high latitude oceans (Fig. 8f), which in combination with the highly similar aerosol- $N_d$  slopes and CVs between SO4S and SO4B, hints at surface observations as a promising way in terms of the vertical co-location issue.

#### 4 ~~Discussion~~ Future improvements

Although this study has ~~clearly~~ demonstrated the significant impacts of major confounders on the estimation of ~~the Twomey effect~~  $N_d$ -to-CCN sensitivity, some caveats remain. In order to achieve an optimal estimate of radiative forcing from the remote-sensing perspective, the following sources of uncertainty should be accounted for in future investigations.

The derivation of  $N_d$  from satellite observations relies on a number of assumptions (Grosvenor et al., 2018), making it prone to systematic biases. While some sampling strategies have been applied to sidestep the biases in  $N_d$  retrieval (see section 2), the uncertainties remain. To further ensure the cloud adiabaticity, there are two practical methods for use, including comparing the CER at different wavelengths (Bennartz and Rausch, 2017) and locating cloud "core" (Zhu et al., 2018). Appropriate  $N_d$  sampling strategies are anyway beneficial in future investigations, though it has relatively little impact on  $S$  (and the implied  $RF_{aci}$ ) (Gryspeerd et al., 2021).

The retrieved AOD (AI) as well as reanalyzed SO<sub>4</sub> were treated as CCN proxies in this study. However, the usability is limited due to the lack of information on the aerosol size and/or hygroscopicity for AOD (AI), and also due to the fact that SO<sub>4</sub> cannot fully explain the variability of CCN since organic aerosols also contribute significantly (Ruehl et al., 2016), particularly in the remote marine boundary layer (Zheng et al., 2020). Therefore, the application of direct CCN retrievals from polarimetric satellite (Hasekamp et al., 2019) is promising in future investigations of aerosol-cloud interactions. However, it would need to be combined with an estimate of the contribution of above-cloud aerosol especially in regions unaffected by continental outflow. More importantly, the PD CCN- $N_d$  relationship has been shown to be a better approximation of the PI and hence the “actual” sensitivity of  $N_d$  to aerosol perturbations than AOD (AI)- $N_d$  relationship, as it is not affected by the differing PI and PD aerosol environments (Gryspeerd et al., 2017). This highlights again the importance of directly retrieved CCN in the assessment of the radiative forcing from the Twomey effect.

Notably, using a linear regression slope from an ordinary least-squares (OLS) line fitting method to describe the actual nonlinear aerosol- $N_d$  (Fig. 1), can introduce additional uncertainties related to the problem of regression dilution (Pitkänen et al., 2016; Quaas et al., 2020). The OLS method is also likely to overestimate the change in  $N_d$  from PI to PD over polluted continents, as a saturation effect will occur as aerosols keep rising under a polluted background. A joint-histograms method proposed by Gryspeerd et al. (2017) can be useful to account for the nonlinearity.

In addition to the precipitation, entrainment mixing is a crucial droplet sink process (Blyth et al., 1988). However, given that it is practically difficult to infer a quantitative measure of the strength of entrainment mixing from satellite observations, its impacts were not considered explicitly here. It has been proven that entrainment mixing process is associated with dynamical and cloud regimes (Warner, 1969; de Roode and Wang, 2007), so the updraft-constraint in this study would also incorporate the effect of entrainment mixing to some extent. Although there have been some attempts to characterize entrainment mixing via the combination of lower tropospheric stability and relative humidity near cloud top (Chen et al., 2014; Jia et al., 2019a) or the  $N_d$ -LWP relationship at a certain phase relaxation time scale describing evaporation-entrainment feedback (Zhang et al., 2022), they are relatively rough approximations or qualitative differentiation. An updated approach for deriving measures of entrainment mixing at the global scale would be highly beneficial.

~~It has been found that  $S$  can vary not only with the spatial resolution of data (Sekiguchi et al., 2003; McComiskey and Feingold, 2012) but also with the spatial scale at which the regression is preformed (Grandey and Stier, 2010). Grandey and Stier (2010) demonstrated that conducting analysis over large regions could induce spurious aerosol-cloud correlations, mainly owing to the spatial co-variations in aerosol type, cloud regime, and meteorological conditions (Grandey and Stier, 2010). Despite the global analyses employed in this study, the applied updraft constraint may make our results less susceptible to this issue. It is expected that, with joint use of updraft constraint and CCN retrieval that greatly eliminates the spatial gradient effects, the global analysis would be preferable compared to regional or local method, since the later could lead to a large bias in the aerosol- $N_d$  slope over pristine oceans where either the instrument detectability limitations on aerosol (Ma et al., 2018a) or the inability of column-integrated measure to represent aerosol near cloud base for low-aerosol condition (see section 3.4), could play a major role.~~

465 Given the impossibility to combine all datasets used in different sections together (e.g., the CBH/CGT from Terra are observed at 10:30 but the precipitation from Aqua at 13:30 local solar time), this work evaluates the individual impact of each bias on the estimate of  $S$  separately. Nevertheless, the sources of bias could be also correlated with each other; thus an optimal estimate of  $S$  with all biases constrained is desirable. Future studies are being planned to make use of CALIOP/CloudSat satellite observations, which provide simultaneous retrievals of aerosol extinction profiles, precipitation, and cloud base height (Mülmenstädt et al., 2018), such that an analysis accounting for all potential sources of bias can be performed.

## 5 Conclusions and discussions

By employing a statistically robust data set from multiple active/passive satellite sensors and reanalysis product, we systematically assessed the aerosol impact on marine warm clouds, and found that the ~~measure of the Twomey effect  $N_d$ -to-CCN sensitivity~~ ( $S$ ) shows a strong dependence on (a) updraft proxy, (b) precipitation, (c) satellite retrieval biases, as well as (d) vertical co-location between aerosol and cloud layer. The key results and the corresponding implications are summarized as follows, and the impacts of issues highlighted here on the overall estimation of  $S$  are listed in Table 23.

1.  $S_{AOD}$  and  $S_{AI}$  are found to increase remarkably with both CBH and CGT (treated as proxies for vertical velocity at cloud base), suggesting that stronger aerosol-cloud interactions generally occur under larger updraft velocity conditions. Although a similar dependency has been reported by some previous studies utilizing in situ aircraft measurements or ground-based remote sensing, they were limited to certain time periods and regions. Instead, ~~the Twomey effect  $S$~~  here is characterized as a function of CBH (CGT) based on 4 years of global satellite observations, which thus can reflect the full variability of cloud dynamic conditions. This functional relationship, as a better alternative of large scale meteorological conditions constraints (less directly linked to cloud dynamics in a cloud scale) could be promising in application to the estimation of global aerosol-cloud radiative forcing, by which the change in  $N_d$  from the PI to the PD may be inferred based on CBH (CGT) climatology from satellite and anthropogenic aerosol emission perturbation assuming to first order un-changed CBH distributions.

2. There exists an intensive sink of cloud droplets by precipitation, thereby leading to a much lower  $N_d$  in raining clouds ( $55 \text{ cm}^{-3}$ ) compared to non-raining clouds ( $125 \text{ cm}^{-3}$ ). In turn, a weaker ~~Twomey effect  $S$~~  was found in raining clouds than that in non-raining clouds, with the corresponding  $S_{AI}$  of 0.45 versus 0.56, respectively. Surprisingly, after lumping all cloud scenes together, the derived  $S_{AI}$  (0.68) is amplified by 21 % (51 %) relative to the non-raining (raining) case, and also a more non-linear aerosol- $N_d$  relationship is diagnosed. We showed that this amplification is just an artifact governed by the joint impacts of the suppression of precipitation by aerosols and the aerosol removal by precipitation. That is, introducing the confounding effect of aerosol-precipitation interactions into the estimation of the Twomey effect can artificially bias the  $S$  to a higher value. The finding highlights the necessity of removing precipitating clouds from statistical analyses when quantifying  $S$  and assessing the Twomey effect. To achieve this, the only way would be simultaneous aerosol-cloud-precipitation retrievals (e.g., from the A-Train satellite constellation). However, due to the fact that most of existing estimates of ~~the Twomey effect  $S$~~  and its radiative forcing did not take this aspect into consideration, the relative change of  $S_{AI}$  from the all clouds to non-raining clouds

presented here could serve as a useful reference for the inter-comparison of the  ~~$N_d$ -to-CCN sensitivities~~ cloud susceptibilities from different studies.

3. The retrieval biases in both aerosol ~~and cloud~~ (3D radiative effects, cloud contamination, and aerosol swelling) and cloud (heterogeneity effects) retrievals tend to underestimate the strength of ~~the Twomey effect~~ cloud. It is noted that the CF can act as a key modulator of these two kinds of retrieval issues, i.e., an increase in CF enhances the aerosol retrieval biases via intensifying near-cloud enhancement of AOD (AI) but reduces cloud retrieval errors via alleviating the cloud ~~inhomogeneity~~ heterogeneity, making it practically difficult to balance the accuracies of both retrievals within a same grid. In terms of aerosol, the use of aerosol reanalysis is a potential way to avoid the near-cloud enhancement of AOD (AI), but note that the issue of aerosol swelling remains to some extent. As for  $N_d$ , the retrievals under high CF (over a  $1^\circ \times 1^\circ$  grid) condition would be preferable even though strict criteria for cloud screening (Grosvenor et al., 2018) have been applied, which, however, could incur an artificial selection of cloud regime since CF also covaries with cloud dynamics. Therefore, applying a CF-updraft constraint in the  $N_d$  screening would be a path forward.

4. Use of vertically integrated SO<sub>4</sub> (SO<sub>4</sub>C) as a proxy of CCN near cloud base results in a degradation of correlation with  $N_d$ , with an approximately two-fold enhancement of  $S$  as compared to using SO<sub>4</sub> near cloud base (SO<sub>4</sub>B). This is mostly attributed to the inability of SO<sub>4</sub>C to capture the full variability of SO<sub>4</sub>B. Generally, SO<sub>4</sub>C is dominated by SO<sub>4</sub> above cloud, which is relatively homogeneous compared to SO<sub>4</sub>B that is tightly linked to rapid changes of anthropogenic but also natural emissions near surface. As a result, to explain the same change of  $N_d$ , the corresponding fractional change in SO<sub>4</sub>C is much smaller than SO<sub>4</sub>B, hence leading to a higher regression slope that, however, is not associated with physically meaningful enhancement of ~~the Twomey effect. The quite  $S$ . The~~ similar aerosol- $N_d$  slopes, correlation coefficients as well as relative variability between SO<sub>4</sub>S (SO<sub>4</sub> near surface) and SO<sub>4</sub>B, suggest that the use of near-surface aerosol measurements, such as particulate matter (Guo et al., 2018) or aerosol extinction coefficients ~~(?)~~ (Liu and Li, 2018), is an effective solution to the problem of vertical co-location in the case that observations of vertical profile of aerosol and cloud base height are unavailable, although its suitability would depend on the degree of coupling of boundary layer (Painemal et al., 2020). Moreover, the result further raises complications to compare and reconcile the diverse  ~~$N_d$ -to-CCN sensitivities~~ cloud susceptibilities from studies utilizing CCN proxies at different altitudes. It should be noted that the derivation of  $N_d$  change from PI to PD (thus radiative forcing) is expected to be less affected, given that the vertical co-location issue also applies to fractional change of aerosol due to anthropogenic emissions, thus partly compensating the enhancement of ~~the  $N_d$ -to-CCN sensitivity~~; nevertheless, the net effect on radiative forcing still needs further exploration.

*Data availability.* The MODIS Aqua and Terra Level 3 products are available from [https://doi.org/10.5067/MODIS/MYD08\\_D3.061](https://doi.org/10.5067/MODIS/MYD08_D3.061) and [https://doi.org/10.5067/MODIS/MOD08\\_D3.061](https://doi.org/10.5067/MODIS/MOD08_D3.061), and Level 2 products are available from [https://doi.org/10.5067/MODIS/MYD06\\_L2.061](https://doi.org/10.5067/MODIS/MYD06_L2.061) and [https://doi.org/10.5067/MODIS/MOD06\\_L2.061](https://doi.org/10.5067/MODIS/MOD06_L2.061). The CloudSat data is available from <http://cloudsat.atmos.colostate.edu/data/>. The MISR Level 2 Cloud Product (MIL2TCSP) data are from <https://asdc.larc.nasa.gov/data/MISR/MIL2TCSP.001/>. The MERRA-2 reanalysis product is collected from <https://goldsmr4.gesdisc.eosdis.nasa.gov/data/MERRA2/>.

*Author contributions.* HJ and JQ designed the research. HJ performed the research and prepared the manuscript, with comments from JQ, EG, CB, and OS.

*Competing interests.* JQ and OS are Associate Editors of ACP. The authors declare that they have no conflict of interest.

530 *Acknowledgements.* MODIS data were acquired from the Level-1 and Atmosphere Archive & Distribution System (LAADS) Distributed  
Active Archive Center (DAAC). MISR products were obtained from the NASA Langley Research Center Atmospheric Science Data Center.  
CloudSat data products were provided by the CloudSat Data Processing Center at the Cooperative Institute for Research in the Atmosphere,  
Colorado State University. MERRA-2 reanalysis products were provided by NASA's Global Monitoring and Assimilation Office (GMAO).  
This work also used JASMIN, the UK's collaborative data analysis environment (<http://jasmin.ac.uk>). The authors gratefully acknowledge  
535 funding by the German Research Foundation (Joint call between National Science Foundation of China and Deutsche Forschungsgemein-  
schaft, DFG, GZ QU 311/28-1, project "CloudTrend") and by the European Union Horizon2020 project FORCES (grant agreement no  
821205). EG was supported by a Royal Society University Research Fellowship (URF/R1/191602).

~~Aekerman, A. S., Kirkpatrick, M. P., Stevens, D. E., and Toon, O. B. (2004). The impact of humidity above stratiform clouds  
on indirect aerosol climate forcing. *Nature*, 432, 1014–1017, doi:10.1038/nature03174~~

540 ~~Albrecht, B.: Aerosols, cloud microphysics, and fractional cloudiness, *Science*, 245, 1227–1230, <https://doi.org/10.1126/science.245.492>  
1989.~~

~~Bellouin, N., et al., Bounding global aerosol radiative forcing of climate change, *Rev. Geophys.*, 58, e2019RG000660,  
doi:10.1029/2019RG000660, 2020.~~

545 ~~Berg, L. K., Berkowitz, C. M., Barnard, J. C., Senum, G., and Springston, S. R. (2011). Observations of the first aerosol  
indirect effect in shallow cumuli. *Geophysical Research Letters*, 38, L03809. <https://doi.org/10.1029/2010GL046047>~~

~~Blyth, A. M., Cooper, W. A., and Jensen, J. B.: A Study of the Source of Entrained Air in Montana Cumuli, *J. Atmos. Sci.*,  
45, 3944–3964, 1988.—~~

~~Boucher, O., et al. (2014), Clouds and Aerosols. In: *Climate Change 2013—The Physical Science Basis*, Cambridge Univ.  
Press, Cambridge.~~

550 ~~Boucher, O. and Quaas, J. Water vapour affects both rain and aerosol optical depth. *Nature Geosci* 6, 4–5 (2013). <https://doi.org/10.1038/n>~~

~~Bougiatioti, A., Nenes, A., Lin, J. J., Brock, C. A., de Gouw, J. A., Liao, J., Middlebrook, A. M., and Welti, A.: Drivers of  
cloud droplet number variability in the summertime in the southeastern United States, *Atmos. Chem. Phys.*, 20, 12163–12176,  
<https://doi.org/10.5194/acp-20-12163-2020>, 2020.~~

555 ~~Buchard, V., Randles, C. A., da Silva, A. M., Darmenov, A., Colarco, P. R., Govindaraju, R., Ferrare, R., Hair, J., Beyersdorf,  
A. J., Ziemba, L. D., and Yu, H. (2017). The MERRA-2 Aerosol Reanalysis, 1980 Onward. Part II: Evaluation and Case Studies.  
*Journal of climate*, 30(17), 6851–6872. <https://doi.org/10.1175/jcli-d-16-0613.1>~~

- Böhm, C., Sourdeval, O., Mülmenstädt, J., Quaas, J., and Crewell, S.: Cloud-base height retrieval from multi-angle satellite data, *Atmos. Meas. Tech.*, 12, 1841–1860, <https://doi.org/10.5194/amt-12-1841-2019>, 2019.
- 560 Chen, J., Liu, Y., Zhang, M., and Peng, Y.: New understanding and quantification of the regime dependence of aerosol-cloud interaction for studying aerosol indirect effects, *Geophys. Res. Lett.*, 43, 1780–1787, <https://doi.org/10.1002/2016GL067683>, 2016.
- Chen, Y.-C., Christensen, M. W., Stephens, G. L., and Seinfeld, J. H. (2014). Satellite-based estimate of global aerosol–cloud radiative forcing by marine warm clouds. *Nature Geoscience*, 7(9), 643–646.
- 565 Costantino, L. and Bréon, F.-M.: Analysis of aerosol-cloud interaction from multi-sensor satellite observations, *Geophys. Res. Lett.*, 37, L11801, <https://doi.org/10.1029/2009GL041828>, 2010.
- Coakley, J. A., Friedman, M. A., and Tahnk, W. R.: Retrieval of cloud properties for partly cloudy imager pixels, *J. Atmos. Ocean. Tech.*, 22, 3–17, 2005.
- Costantino, L. and Bréon, F.-M.: Aerosol indirect effect on warm clouds over South-East Atlantic, from co-located MODIS and CALIPSO observations, *Atmos. Chem. Phys.*, 13, 69–88, <https://doi.org/10.5194/acp-13-69-2013>, 2013.
- 570 de Roode, S. R. and Wang, Q.: Do stratocumulus clouds detrain? FIRE I data revisited, *Bound.-Lay. Meteorol.*, 122, 479–491, <https://doi.org/10.1007/s10546-006-9113-1>, 2007.
- Feingold, G., Eberhard, W. L., Veron, D. E., and Previdi, M.: First measurements of the Twomey indirect effect using ground-based remote sensors, *Geophys. Res. Lett.*, 30, 1287, <https://doi.org/10.1029/2002GL016633>, 2003.
- 575 Feingold, G., Goren, T., and Yamaguchi, T.: Quantifying Albedo Susceptibility Biases in Shallow Clouds, *Atmos. Chem. Phys. Discuss. preprint*, <https://doi.org/10.5194/acp-2021-859>, in review, 2021.
- Forster, P., et al. (2021), The Earth’s energy budget, climate feedbacks, and climate sensitivity, in: *Climate Change 2021: The Physical Science Basis. Contribution of Working Group I to the Sixth Assessment Report of the Intergovernmental Panel on Climate Change*, Cambridge University Press (in press).
- 580 Freud, E., and D. Rosenfeld (2012), Linear relation between convective cloud drop number concentration and depth for rain initiation, *J. Geophys. Res.*, 117, D02207, doi:10.1029/2011JD016457.
- Gerber, H., Frick, G., Jensen, J. B., and Hudson, J. G.: Entrainment, mixing and microphysics in trade-wind cumulus, *J. Meteorol. Soc. Jpn.*, 86A, 87–106, 2008.
- Grandey, B. S. and Stier, P.: A critical look at spatial scale choices in satellite-based aerosol indirect effect studies, *Atmos. Chem. Phys.*, 10, 11459–11470, <https://doi.org/10.5194/acp-10-11459-2010>, 2010.
- 585 Grosvenor, D. P. et al. Remote sensing of cloud droplet number concentration in warm clouds: a review of the current state of knowledge and perspectives. *Rev. Geophys.* 56, 409–453 (2018).
- Gryspeerd, E. and Stier, P.: Regime-based analysis of aerosol-cloud interactions, *Geophys. Res. Lett.*, 39, L21802, <https://doi.org/10.1029/2012>.
- 590 Gryspeerd, E., Stier, P., White, B. A., and Kipling, Z.: Wet scavenging limits the detection of aerosol effects on precipitation, *Atmos. Chem. Phys.*, 15, 7557–7570, <https://doi.org/10.5194/acp-15-7557-2015>, 2015.



- Gryspeerd, E., Quaas, J., Ferrachat, S., Gettelman, A., Ghan, S., Lohmann, U., Morrison, H., Neubauer, D., Partridge, D. G., Stier, P., Takemura, T., Wang, H., Wang, M., and Zhang, K.: Constraining the instantaneous aerosol influence on cloud albedo, *P. Nat. Acad. Sci. USA*, 114, 4899–4904, <https://doi.org/10.1073/pnas.1617765114>, 2017.
- 595 Gryspeerd, E., Mülmenstädt, J., Gettelman, A., Malavelle, F. F., Morrison, H., Neubauer, D., Partridge, D. G., Stier, P., Takemura, T., Wang, H., Wang, M., and Zhang, K.: Surprising similarities in model and observational aerosol radiative forcing estimates, *Atmos. Chem. Phys.*, 20, 613–623, <https://doi.org/10.5194/acp-20-613-2020>, 2020.
- Guo, J., Liu, H., Li, Z., Rosenfeld, D., Jiang, M., Xu, W., Jiang, J. H., He, J., Chen, D., Min, M., and Zhai, P.: Aerosol-induced changes in the vertical structure of precipitation: a perspective of TRMM precipitation radar, *Atmos. Chem. Phys.*, 18, 13329–13343, <https://doi.org/10.5194/acp-18-13329-2018>, 2018.
- 600 Hasekamp, O., Gryspeerd, E., and Quaas, J.: Analysis of polarimetric satellite measurements suggests stronger cooling due to aerosol-cloud interactions, *Nature Comm.*, 10, 5405, <https://doi.org/10.1038/s41467-019-13372-2>, 2019.
- Hudson, J. G. and Noble, S.: CCN and vertical velocity influences on droplet concentrations and supersaturations in clean and polluted stratus clouds, *J. Atmos. Sci.*, 71, 312–331, doi:10.1175/JAS-D-13-086.1, 2014.
- 605 Jia, H., Ma, X., Yu, F., Liu, Y., and Yin, Y. (2019a). Distinct impacts of increased aerosols on cloud droplet number concentration of stratus/stratocumulus and cumulus. *Geophysical Research Letters*, 46. <https://doi.org/10.1029/2019GL085081>
- Jia, H., Ma, X., Quaas, J., Yin, Y., and Qiu, T.: Is positive correlation between cloud droplet effective radius and aerosol optical depth over land due to retrieval artifacts or real physical processes?, *Atmos. Chem. Phys.*, 19, 8879–8896, <https://doi.org/10.5194/acp-2019b>.
- 610 Jia, H., Ma, X., Yu, F. and Quaas, J. Significant underestimation of radiative forcing by aerosol-cloud interactions derived from satellite-based methods, *Nat Commun.*, 12, 3649. <https://doi.org/10.1038/s41467-021-23888-1>, 2021.
- Kacarab, M., Thornhill, K. L., Dobraccki, A., Howell, S. G., O'Brien, J. R., Freitag, S., Poellot, M. R., Wood, R., Zuidema, P., Redemann, J., and Nenes, A.: Biomass burning aerosol as a modulator of the droplet number in the southeast Atlantic region, *Atmos. Chem. Phys.*, 20, 3029–3040, <https://doi.org/10.5194/acp-20-3029-2020>, 2020.
- 615 Kaufman, Y. J., Koren, I., Remer, L. A., Rosenfeld, D., and Rudich, Y.: The effect of smoke, dust, and pollution aerosol on shallow cloud development over the Atlantic Ocean, *P. Natl. Acad. Sci. USA*, 102, 11207–11212, <https://doi.org/10.1073/pnas.0505191102>, 2005.
- Levy, R. C., Mattoo, S., Munchak, L. A., Remer, L. A., Sayer, A. M., Patadia, F., and Hsu, N. C.: The Collection 6 MODIS aerosol products over land and ocean, *Atmos. Meas. Tech.*, 6, 2989–3034, <https://doi.org/10.5194/amt-6-2989-2013>, 2013.
- 620 Liu, J. and Li, Z.: Significant underestimation in the optically based estimation of the aerosol first indirect effect induced by the aerosol swelling effect, *Geophys. Res. Lett.*, 45, 5690–5699, <https://doi.org/10.1029/2018GL077679>, 2018.
- Ma, P.-L., Rasch, P. J., Chepfer, H., Winker, D. M., and Ghan, S. J.: Observational constraint on cloud susceptibility weakened by aerosol retrieval limitations, *Nat. Commun.*, 9, 2640, <https://doi.org/10.1038/s41467-018-05028-4>, 2018.
- 625 Ma, X., Jia, H., Yu, F., and Quaas, J.: Opposite aerosol index-cloud droplet effective radius correlations over major industrial regions and their adjacent oceans, *Geophys. Res. Lett.*, 45, 5771–5778, 2018.

- Ma, X. Y., Yu, F. Q., and Quaas, J.: Reassessment of satellite-based estimate of aerosol climate forcing, *J. Geophys. Res.-Atmos.*, 119, 10394–10409, <https://doi.org/10.1002/2014jd021670>, 2014.
- Matheson, M. A., Coakley Jr., J. A., and Tahnk, W. R.: Multiyear advanced very high resolution radiometer observations of summertime stratocumulus collocated with aerosols in the northeastern Atlantic, *J. Geophys. Res.*, 111, D15206, <https://doi.org/10.1029/2006>-2006.
- McComiskey, A., Feingold, G., Frisch, A. S., Turner, D. D., Miller, M. A., Chiu, J. C., Min, Q., and Ogren, J. A.: An assessment of aerosol-cloud interactions in marine stratus clouds based on surface remote sensing, *J. Geophys. Res.*, 114, D09203, [doi:10.1029/2008JD011006](https://doi.org/10.1029/2008JD011006), 2009.
- McCoy, D. T., F. A. M. Bender, J. K. C. Mohrmann, D. L. Hartmann, R. Wood, and D. P. Grosvenor (2017), The global aerosol-cloud first indirect effect estimated using MODIS, MERRA, and AeroCom, *J. Geophys. Res. Atmos.*, 122, [doi:10.1002/2016JD0261](https://doi.org/10.1002/2016JD0261).
- Mülmenstädt, J., Sourdeval, O., Henderson, D. S., L'Ecuyer, T. S., Unglaub, C., Jungandreas, L., Böhm, C., Russell, L. M., and Quaas, J.: Using CALIOP to estimate cloud-field-base height and its uncertainty: the Cloud-Base-Altitude-Spatial Extrapolator (CBASE) algorithm and dataset, *Earth Syst. Sci. Data*, 10, 2279–2293, <https://doi.org/10.5194/essd-10-2279-2018>, 2018.
- Nakajima, T., Higurashi, A., Kawamoto, K., and Penner, J. E.: A possible correlation between satellite-derived cloud and aerosol microphysical parameters, *Geophys. Res. Lett.*, 28, 1171–1174, 2001.
- NASA/LARC/SD/ASDC: MISR Level 2 TOA/Cloud Height and Motion parameters V001, NASA Langley Atmospheric Science Data Center DAAC, [https://doi.org/10.5067/Terra/MISR/MIL2TCSP\\_L2.001](https://doi.org/10.5067/Terra/MISR/MIL2TCSP_L2.001), 2012.
- Painemal, D., Chang, F.-L., Ferrare, R., Burton, S., Li, Z., Smith Jr., W. L., Minnis, P., Feng, Y., and Clayton, M.: Reducing uncertainties in satellite estimates of aerosol-cloud interactions over the subtropical ocean by integrating vertically resolved aerosol observations, *Atmos. Chem. Phys.*, 20, 7167–7177, <https://doi.org/10.5194/acp-20-7167-2020>, 2020.
- Penner, J. E., Xu, L., and Wang, M.: Satellite methods underestimate indirect climate forcing by aerosols, *P. Natl. Acad. Sci. USA*, 108, 13404, <https://doi.org/10.1073/pnas.1018526108>, 2011.
- Pitkänen, M. R. A., Mikkonen, S., Lehtinen, K. E. J., Lipponen, A., and Arola, A.: Artificial bias typically neglected in comparisons of uncertain atmospheric data, *Geophys. Res. Lett.*, 43, 10003–10011, <https://doi.org/10.1002/2016GL070852>, 2016.
- Platnick, S., King, M. D., and Hubanks, P.: MODIS Atmosphere L3 Daily Product, NASA MODIS Adaptive Processing System, Goddard Space Flight Center, [https://doi.org/10.5067/MODIS/MOD08\\_D3.061](https://doi.org/10.5067/MODIS/MOD08_D3.061) (Terra), <https://doi.org/10.5067/MODIS/MYD08> (Aqua), 2017a.
- Platnick, S., Meyer, K. G., King, M. D., Wind, G., Amarasinghe, N., Marchant, B., Arnold, G. T., Zhang, Z., Hubanks, P. A., Holz, R. E., Yang, P., Ridgway, W. L., and Riedi, J.: The MODIS cloud optical and microphysical products: Collection 6 updates and examples from Terra and Aqua, *IEEE T. Geosci. Remote*, 55, 502–525, <https://doi.org/10.1109/TGRS.2016.2610522>, 2017b.

- Platnick, S., Ackerman, S., King, M., Wind, G., Meyer, K., Menzel, P., Frey, R., Holz, R., Baum, B., and Yang, P.: MODIS-atmosphere L2 cloud product (06\_L2), NASA MODIS Adaptive Processing System, Goddard Space Flight Center, [https://doi.org/10.5067/MODIS/MOD06\\_L2.061](https://doi.org/10.5067/MODIS/MOD06_L2.061) (Terra), [https://doi.org/10.5067/MODIS/MYD06\\_L2.061](https://doi.org/10.5067/MODIS/MYD06_L2.061) (Aqua), 2017c.
- Quaas, J., Arola, A., Cairns, B., Christensen, M., Deneke, H., Ekman, A. M. L., Feingold, G., Fridlind, A., Gryspeerdt, E.,  
665 Hasekamp, O., Li, Z., Lipponen, A., Ma, P.-L., Mülmenstädt, J., Nenes, A., Penner, J. E., Rosenfeld, D., Schrödner, R., Sinclair, K., Sourdeval, O., Stier, P., Tesche, M., van Diedenhoven, B., and Wendisch, M.: Constraining the Twomey effect from satellite observations: issues and perspectives, *Atmos. Chem. Phys.*, 20, 15079–15099, <https://doi.org/10.5194/acp-20-15079-2020>, 2020.
- Quaas, J., Boucher, O., Bellouin, N., and Kinne, S.: Satellite-based estimate of the direct and indirect aerosol climate forcing,  
670 *J. Geophys. Res.*, 113, D05204, <https://doi.org/10.1029/2007JD008962>, 2008.
- Quaas, J., Boucher, O., and Lohmann, U.: Constraining the total aerosol indirect effect in the LMDZ and ECHAM4 GCMs using MODIS satellite data, *Atmos. Chem. Phys.*, 6, 947–955, <https://doi.org/10.5194/acp-6-947-2006>, 2006.
- Quaas, J., B. Stevens, U. Lohmann, and P. Stier, Interpreting the cloud cover – aerosol optical depth relationship found in satellite data using a general circulation model, *Atmos. Chem. Phys.*, 10, 6129–6135, doi:10.5194/acp-10-6129-2010, 2010.
- 675 Randles, C. A., da Silva, A. M., Buchard, V., Colarco, P. R., Darmenov, A., Govindaraju, R., Smirnov, A., Holben, B., Ferrare, R., Hair, J., Shinozuka, Y., and Flynn, C. J.: The MERRA-2 Aerosol Reanalysis, 1980 Onward. Part I: System Description and Data Assimilation Evaluation, *J. Climate*, 30, 6823–6850, <https://doi.org/10.1175/JCLI-D-16-0609.1>, 2017.
- Reutter, P., Su, H., Trentmann, J., Simmel, M., Rose, D., Gunthe, S. S., Wernli, H., Andreae, M. O., and Pöschl, U.: Aerosol- and updraft-limited regimes of cloud droplet formation: influence of particle number, size and hygroscopicity on the activation of cloud condensation nuclei (CCN), *Atmos. Chem. Phys.*, 9, 7067–7080, <https://doi.org/10.5194/acp-9-7067-2009>, 2009.
- 680 Rosenfeld, D., Zhu, Y., Wang, M., Zheng, Y., Goren, T., and Yu, S.: Aerosol-driven droplet concentrations dominate coverage and water of oceanic low-level clouds, *Science*, 363, eaav0566, <https://doi.org/10.1126/science.aav0566>, 2019.
- Ruehl, C. R., J. F. Davies, and K. R. Wilson (2016), An interfacial mechanism for cloud droplet formation on organic aerosols, *Science*, 351(6280), 1447–1450.
- 685 Saponaro, G., Kolmonen, P., Sogacheva, L., Rodriguez, E., Virtanen, T., and de Leeuw, G.: Estimates of the aerosol indirect effect over the Baltic Sea region derived from 12 years of MODIS observations, *Atmos. Chem. Phys.*, 17, 3133–3143, <https://doi.org/10.5194/acp-17-3133-2017>, 2017.
- Sassen, K. and Wang, Z.: Classifying clouds around the globe with the CloudSat radar: 1-year of results, *Geophys. Res. Lett.*, 35, L04805, doi:10.1029/2007GL032591, 2008.
- 690 Schmidt, J., Ansmann, A., Bühl, J., and Wandinger, U.: Strong aerosol–cloud interaction in altocumulus during updraft periods: lidar observations over central Europe, *Atmos. Chem. Phys.*, 15, 10687–10700, <https://doi.org/10.5194/acp-15-10687-2015>, 2015.
- Seinfeld, J. H., Bretherton, C., Carslaw, K. S., Coe, H., Demott, P. J., Dunlea, E. J., Feingold, G., Ghan, S., Chan, S., Guenther, A., Kahn, R., Kredenweis, S., Molina, M., Nenes, A., Penner, J., Prather, K., Ramanathan, V., Ramaswamy, V.,

- 695 Rashch, P., and Ravishankara, A.: Improving our fundamental understanding of the role of aerosol-cloud interactions in the climate system, *P. Natl. Acad. Sci. USA*, 113, 5781–5790, 2016.—
- Smith, C. J., Kramer, R. J., Myhre, G., Alterskjær, K., Collins, W., Sima, A., Boucher, O., Dufresne, J.-L., Nabat, P., Michou, M., Yukimoto, S., Cole, J., Paynter, D., Shioyama, H., O'Connor, F. M., Robertson, E., Wiltshire, A., Andrews, T., Hannay, C., Miller, R., Nazarenko, L., Kirkevåg, A., Olivić, D., Fiedler, S., Lewinschal, A., Mackallah, C., Dix, M., Pineus, R., and Forster, P. M.: Effective radiative forcing and adjustments in CMIP6 models, *Atmos. Chem. Phys.*, 20, 9591–9618, <https://doi.org/10.5194/acp-20-9591-2020>, 2020.
- 700 Sourdeval, O., C.-Labonnote, L., Baran, A. J., Mülmenstädt, J., and Brogniez, G.: A methodology for simultaneous retrieval of ice and liquid water cloud properties — Part 2: Near-global retrievals and evaluation against A-Train products, *Q. J. Roy. Meteor. Soc.*, 142, 3063–3081, <https://doi.org/10.1002/qj.2889>, 2016.—
- 705 Stier, P.: Limitations of passive remote sensing to constrain global cloud condensation nuclei, *Atmos. Chem. Phys.*, 16, 6595–6607, <https://doi.org/10.5194/acp-16-6595-2016>, 2016.—
- Slawinska, J., Grabowski, W. W., Pawlowska, H., and Morrison, H.: Droplet activation and mixing in large-eddy simulation of a shallow cumulus field, *J. Atmos. Sci.*, 69, 444–462, 2012.—
- Twomey, S.: Pollution and the planetary albedo, *Atmos. Environ.*, 8, 1251–1256, [https://doi.org/10.1016/0004-6981\(74\)90004-3](https://doi.org/10.1016/0004-6981(74)90004-3), 1974.
- 710 Várnai, T. and Marshak, A.: MODIS observations of enhanced clear-sky reflectance near clouds, *Geophys. Res. Lett.*, 36, L06807, <https://doi.org/10.1029/2008GL037089>, 2009.—
- Várnai, T., and Marshak, A. (2015). Effect of cloud fraction on near-cloud aerosol behavior in the MODIS atmospheric correction ocean color product. *Remote Sensing*, 7(5), 5283–5299.—
- 715 Várnai, T., and Marshak, A. (2021). Analysis of Near-Cloud Changes in Atmospheric Aerosols Using Satellite Observations and Global Model Simulations. *Remote Sensing*, 13(6), 1151.—
- Warner, J.: The microstructure of cumulus clouds. Part II. The effect on droplet size distribution of cloud nucleus spectrum and updraft velocity, *J. Atmos. Sci.*, 26, 1272–1282, 1969.—
- Zhang, J., Reid, J., and Holben, B.: An analysis of potential cloud artifacts in MODIS over-ocean aerosol optical thickness products, *Geophys. Res. Lett.*, 32, L15803, <https://doi.org/10.1029/2005GL023254>, 2005.—
- 720 Zhang, J., Zhou, X., and Feingold, G.: Albedo susceptibility of Northeastern Pacific stratocumulus: the role of covarying meteorological conditions, *Atmos. Chem. Phys. Discuss. preprint*, <https://doi.org/10.5194/acp-2021-754>, in review, 2021.—
- Zhang, Z. and Platnick S.: An assessment of differences between cloud effective particle radius retrievals for marine water clouds from three MODIS spectral bands, *J. Geophys. Res.*, 116, D20215, <https://doi.org/10.1029/2011JD016216>, 2011.—
- 725 Zheng, G., Kuang, C., Uin, J., Watson, T., and Wang, J.: Large contribution of organics to condensational growth and formation of cloud condensation nuclei (CCN) in the remote marine boundary layer, *Atmos. Chem. Phys.*, 20, 12515–12525, <https://doi.org/10.5194/acp-20-12515-2020>, 2020.—
- Zheng, Y. and Rosenfeld, D.: Linear relation between convective cloud base height and updrafts and application to satellite retrievals, *Geophys. Res. Lett.*, 42, 6485–6491, <https://doi.org/10.1002/2015GL064809>, 2015.—

730 ~~Zhu, Y., Rosenfeld, D., and Li, Z.: Under what conditions can we trust retrieved cloud drop concentrations in broken marine stratocumulus?, J. Geophys. Res.-Atmos., 123, 8754–8767, <https://doi.org/10.1029/2017JD028083>, 2018.~~

## References

- Ackerman, A. S., Kirkpatrick, M. P., Stevens, D. E., and Toon, O. B.: The impact of humidity above stratiform clouds on indirect aerosol climate forcing, *Nature*, 432, 1014–1017, <https://doi.org/10.1038/nature03174>, 2004.
- 735 Albrecht, B. A.: Aerosols, Cloud Microphysics, and Fractional Cloudiness, *Science* (80-. ), 245, 1227–1230, <https://doi.org/10.1126/science.245.4923.1227>, 1989.
- Allen, R. J., Amiri-Farahani, A., Lamarque, J.-F., Smith, C., Shindell, D., Hassan, T., and Chung, C. E.: Observationally constrained aerosol–cloud semi-direct effects, *npj Clim. Atmos. Sci.*, 2, 16, <https://doi.org/10.1038/s41612-019-0073-9>, 2019.
- Anderson, T. L., Charlson, R. J., Winker, D. M., Ogren, J. A., and Holmén, K.: Mesoscale Variations of Tropospheric Aerosols, *J. Atmos. Sci.*, 60, 119–136, [https://doi.org/10.1175/1520-0469\(2003\)060<0119:MVOTA>2.0.CO;2](https://doi.org/10.1175/1520-0469(2003)060<0119:MVOTA>2.0.CO;2), 2003.
- 740 Bellouin, N., Quaas, J., Gryspeerdt, E., Kinne, S., Stier, P., Watson-Parris, D., Boucher, O., Carslaw, K. S., Christensen, M., Daniau, A., Dufresne, J., Feingold, G., Fiedler, S., Forster, P., Gettelman, A., Haywood, J. M., Lohmann, U., Malavelle, F., Mauritsen, T., McCoy, D. T., Myhre, G., Mülmenstädt, J., Neubauer, D., Possner, A., Rugenstein, M., Sato, Y., Schulz, M., Schwartz, S. E., Sourdeval, O., Storelvmo, T., Toll, V., Winker, D., and Stevens, B.: Bounding Global Aerosol Radiative Forcing of Climate Change, *Rev. Geophys.*, 58, e2019RG000 660, <https://doi.org/10.1029/2019RG000660>, 2020.
- 745 Bennartz, R. and Rausch, J.: Global and regional estimates of warm cloud droplet number concentration based on 13 years of AQUA-MODIS observations, *Atmos. Chem. Phys.*, 17, 9815–9836, <https://doi.org/10.5194/acp-17-9815-2017>, 2017.
- Berg, L. K., Berkowitz, C. M., Barnard, J. C., Senum, G., and Springston, S. R.: Observations of the first aerosol indirect effect in shallow cumuli, *Geophys. Res. Lett.*, 38, L03 809, <https://doi.org/10.1029/2010GL046047>, 2011.
- 750 Blyth, A. M., Cooper, W. A., and Jensen, J. B.: A Study of the Source of Entrained Air in Montana Cumuli, *J. Atmos. Sci.*, 45, 3944–3964, [https://doi.org/10.1175/1520-0469\(1988\)045<3944:ASOTSO>2.0.CO;2](https://doi.org/10.1175/1520-0469(1988)045<3944:ASOTSO>2.0.CO;2), 1988.
- Böhm, C., Sourdeval, O., Mülmenstädt, J., Quaas, J., and Crewell, S.: Cloud base height retrieval from multi-angle satellite data, *Atmos. Meas. Tech.*, 12, 1841–1860, <https://doi.org/10.5194/amt-12-1841-2019>, 2019.
- Boucher, O. and Quaas, J.: Water vapour affects both rain and aerosol optical depth, *Nat. Geosci.*, 6, 4–5, <https://doi.org/10.1038/ngeo1692>, 755 2013.
- Bougiatioti, A., Nenes, A., Lin, J. J., Brock, C. A., de Gouw, J. A., Liao, J., Middlebrook, A. M., and Welti, A.: Drivers of cloud droplet number variability in the summertime in the southeastern United States, *Atmos. Chem. Phys.*, 20, 12 163–12 176, <https://doi.org/10.5194/acp-20-12163-2020>, 2020.
- Buchard, V., Randles, C. A., da Silva, A. M., Darmenov, A., Colarco, P. R., Govindaraju, R., Ferrare, R., Hair, J., Beyersdorf, A. J., Ziemba, L. D., and Yu, H.: The MERRA-2 Aerosol Reanalysis, 1980 Onward. Part II: Evaluation and Case Studies, *J. Clim.*, 30, 6851–6872, <https://doi.org/10.1175/JCLI-D-16-0613.1>, 2017.
- 760 Chen, J., Liu, Y., Zhang, M., and Peng, Y.: New understanding and quantification of the regime dependence of aerosol-cloud interaction for studying aerosol indirect effects, *Geophys. Res. Lett.*, 43, 1780–1787, <https://doi.org/10.1002/2016GL067683>, 2016.
- Chen, Y.-C., Christensen, M. W., Stephens, G. L., and Seinfeld, J. H.: Satellite-based estimate of global aerosol–cloud radiative forcing by marine warm clouds, *Nat. Geosci.*, 7, 643–646, <https://doi.org/10.1038/ngeo2214>, 2014.
- 765 Christensen, M. W., Neubauer, D., Poulsen, C. A., Thomas, G. E., McGarragh, G. R., Povey, A. C., Proud, S. R., and Grainger, R. G.: Unveiling aerosol–cloud interactions – Part 1: Cloud contamination in satellite products enhances the aerosol indirect forcing estimate, *Atmos. Chem. Phys.*, 17, 13 151–13 164, <https://doi.org/10.5194/acp-17-13151-2017>, 2017.

- Coakley, J. A., Friedman, M. A., and Tahnk, W. R.: Retrieval of Cloud Properties for Partly Cloudy Imager Pixels, *J. Atmos. Ocean. Technol.*, 22, 3–17, <https://doi.org/10.1175/JTECH-1681.1>, 2005.
- Costantino, L. and Bréon, F.-M.: Analysis of aerosol-cloud interaction from multi-sensor satellite observations, *Geophys. Res. Lett.*, 37, L11 801, <https://doi.org/10.1029/2009GL041828>, 2010.
- Costantino, L. and Bréon, F.-M.: Aerosol indirect effect on warm clouds over South-East Atlantic, from co-located MODIS and CALIPSO observations, *Atmos. Chem. Phys.*, 13, 69–88, <https://doi.org/10.5194/acp-13-69-2013>, 2013.
- de Roode, S. R. and Wang, Q.: Do stratocumulus clouds detrain? FIRE I data revisited, *Boundary-Layer Meteorol.*, 122, 479–491, <https://doi.org/10.1007/s10546-006-9113-1>, 2007.
- Fan, J., Yuan, T., Comstock, J. M., Ghan, S., Khain, A., Leung, L. R., Li, Z., Martins, V. J., and Ovchinnikov, M.: Dominant role by vertical wind shear in regulating aerosol effects on deep convective clouds, *J. Geophys. Res.*, 114, D22 206, <https://doi.org/10.1029/2009JD012352>, 2009.
- Feingold, G., Remer, L. A., Ramaprasad, J., and Kaufman, Y. J.: Analysis of smoke impact on clouds in Brazilian biomass burning regions: An extension of Twomey’s approach, *J. Geophys. Res. Atmos.*, 106, 22 907–22 922, <https://doi.org/10.1029/2001JD000732>, 2001.
- Feingold, G., Eberhard, W. L., Veron, D. E., and Previdi, M.: First measurements of the Twomey indirect effect using ground-based remote sensors, *Geophys. Res. Lett.*, 30, <https://doi.org/10.1029/2002GL016633>, 2003.
- Feingold, G., Goren, T., and Yamaguchi, T.: Quantifying Albedo Susceptibility Biases in Shallow Clouds, *Atmos. Chem. Phys. Discuss.*, 2021, 1–31, <https://doi.org/10.5194/acp-2021-859>, 2021.
- Forster, P. M., Storelvmo, T., Armour, K., Collins, W., Dufresne, J. L., Frame, D., Lunt, D. J., Mauritsen, T., Palmer, M. D., Watanabe, M., Wild, M., and Zhang, H.: Chapter 7: The Earth’s Energy Budget, Climate Feedbacks, and Climate Sensitivity, *Clim. Chang. 2021 Phys. Sci. Basis. Contrib. Work. Gr. I to Sixth Assess. Rep. Intergov. Panel Clim. Chang.*, 2021.
- Freud, E. and Rosenfeld, D.: Linear relation between convective cloud drop number concentration and depth for rain initiation, *J. Geophys. Res. Atmos.*, 117, D02 207, <https://doi.org/10.1029/2011JD016457>, 2012.
- Gerber, H.: Microphysics of marine stratocumulus clouds with two drizzle modes, *J. Atmos. Sci.*, 53, 1649–1662, [https://doi.org/10.1175/1520-0469\(1996\)053<1649:MOMSCW>2.0.CO;2](https://doi.org/10.1175/1520-0469(1996)053<1649:MOMSCW>2.0.CO;2), 1996.
- Grandey, B. S. and Stier, P.: A critical look at spatial scale choices in satellite-based aerosol indirect effect studies, *Atmos. Chem. Phys.*, 10, 11 459–11 470, <https://doi.org/10.5194/acp-10-11459-2010>, 2010.
- Grosvenor, D. P., Sourdeval, O., Zuidema, P., Ackerman, A., Alexandrov, M. D., Bennartz, R., Boers, R., Cairns, B., Chiu, J. C., Christensen, M., Deneke, H., Diamond, M., Feingold, G., Fridlind, A., Hünerbein, A., Knist, C., Kollias, P., Marshak, A., McCoy, D., Merk, D., Painemal, D., Rausch, J., Rosenfeld, D., Russchenberg, H., Seifert, P., Sinclair, K., Stier, P., van Diedenhoven, B., Wendisch, M., Werner, F., Wood, R., Zhang, Z., and Quaas, J.: Remote Sensing of Droplet Number Concentration in Warm Clouds: A Review of the Current State of Knowledge and Perspectives, *Rev. Geophys.*, 56, 409–453, <https://doi.org/10.1029/2017RG000593>, 2018.
- Gryspeerdt, E. and Stier, P.: Regime-based analysis of aerosol-cloud interactions, *Geophys. Res. Lett.*, 39, L21 802, <https://doi.org/10.1029/2012GL053221>, 2012.
- Gryspeerdt, E., Stier, P., White, B. A., and Kipling, Z.: Wet scavenging limits the detection of aerosol effects on precipitation, *Atmos. Chem. Phys.*, 15, 7557–7570, <https://doi.org/10.5194/acp-15-7557-2015>, 2015.
- Gryspeerdt, E., Quaas, J., Ferrachat, S., Gettelman, A., Ghan, S., Lohmann, U., Morrison, H., Neubauer, D., Partridge, D. G., Stier, P., Takemura, T., Wang, H., Wang, M., and Zhang, K.: Constraining the instantaneous aerosol influence on cloud albedo, *Proc. Natl. Acad. Sci.*, 114, 4899–4904, <https://doi.org/10.1073/pnas.1617765114>, 2017.

- Gryspeerd, E., Mülmenstädt, J., Gettelman, A., Malavelle, F. F., Morrison, H., Neubauer, D., Partridge, D. G., Stier, P., Takemura, T., Wang, H., Wang, M., and Zhang, K.: Surprising similarities in model and observational aerosol radiative forcing estimates, *Atmos. Chem. Phys.*, 20, 613–623, <https://doi.org/10.5194/acp-20-613-2020>, 2020.
- 810 Gryspeerd, E., McCoy, D. T., Crosbie, E., Moore, R. H., Nott, G. J., Painemal, D., Small-Griswold, J., Sorooshian, A., and Ziemba, L.: The impact of sampling strategy on the cloud droplet number concentration estimated from satellite data, *Atmos. Meas. Tech. Discuss.*, 2021, 1–25, <https://doi.org/10.5194/amt-2021-371>, 2021.
- Guo, J., Liu, H., Li, Z., Rosenfeld, D., Jiang, M., Xu, W., Jiang, J. H., He, J., Chen, D., Min, M., and Zhai, P.: Aerosol-induced changes in the vertical structure of precipitation: a perspective of TRMM precipitation radar, *Atmos. Chem. Phys.*, 18, 13 329–13 343, <https://doi.org/10.5194/acp-18-13329-2018>, 2018.
- 815 Hasekamp, O. P., Gryspeerd, E., and Quaas, J.: Analysis of polarimetric satellite measurements suggests stronger cooling due to aerosol–cloud interactions, *Nat. Commun.*, 10, 5405, <https://doi.org/10.1038/s41467-019-13372-2>, 2019.
- Haywood, J. M., Osborne, S. R., and Abel, S. J.: The effect of overlying absorbing aerosol layers on remote sensing retrievals of cloud effective radius and cloud optical depth, *Q. J. R. Meteorol. Soc.*, 130, 779–800, <https://doi.org/10.1256/qj.03.100>, 2004.
- 820 Hersbach, H., Bell, B., Berrisford, P., Hirahara, S., Horányi, A., Muñoz-Sabater, J., Nicolas, J., Peubey, C., Radu, R., Schepers, D., Simmons, A., Soci, C., Abdalla, S., Abellan, X., Balsamo, G., Bechtold, P., Biavati, G., Bidlot, J., Bonavita, M., Chiara, G., Dahlgren, P., Dee, D., Diamantakis, M., Dragani, R., Flemming, J., Forbes, R., Fuentes, M., Geer, A., Haimberger, L., Healy, S., Hogan, R. J., Hólm, E., Janisková, M., Keeley, S., Laloyaux, P., Lopez, P., Lupu, C., Radnoti, G., Rosnay, P., Rozum, I., Vamborg, F., Villaume, S., and Thépaut, J.: The ERA5 global reanalysis, *Q. J. R. Meteorol. Soc.*, 146, 1999–2049, <https://doi.org/10.1002/qj.3803>, 2020.
- 825 Hudson, J. G. and Noble, S.: CCN and Vertical Velocity Influences on Droplet Concentrations and Supersaturations in Clean and Polluted Stratus Clouds, *J. Atmos. Sci.*, 71, 312–331, <https://doi.org/10.1175/JAS-D-13-086.1>, 2014.
- Jia, H., Ma, X., Quaas, J., Yin, Y., and Qiu, T.: Is positive correlation between cloud droplet effective radius and aerosol optical depth over land due to retrieval artifacts or real physical processes?, *Atmos. Chem. Phys.*, <https://doi.org/10.5194/acp-19-8879-2019>, 2019a.
- Jia, H., Ma, X., Yu, F., Liu, Y., and Yin, Y.: Distinct Impacts of Increased Aerosols on Cloud Droplet Number Concentration of Stratus/Stratocumulus and Cumulus, *Geophys. Res. Lett.*, 46, 13 517–13 525, <https://doi.org/https://doi.org/10.1029/2019GL085081>, 2019b.
- 830 Jia, H., Ma, X., Yu, F., and Quaas, J.: Significant underestimation of radiative forcing by aerosol–cloud interactions derived from satellite-based methods, *Nat. Commun.*, 12, 3649, <https://doi.org/10.1038/s41467-021-23888-1>, 2021.
- Kacarab, M., Thornhill, K. L., Dobracki, A., Howell, S. G., O’Brien, J. R., Freitag, S., Poellot, M. R., Wood, R., Zuidema, P., Redemann, J., and Nenes, A.: Biomass burning aerosol as a modulator of the droplet number in the southeast Atlantic region, *Atmos. Chem. Phys.*, 20, 3029–3040, <https://doi.org/10.5194/acp-20-3029-2020>, 2020.
- 835 Kaufman, Y. J., Koren, I., Remer, L. A., Rosenfeld, D., and Rudich, Y.: The effect of smoke, dust, and pollution aerosol on shallow cloud development over the Atlantic Ocean, *Proc. Natl. Acad. Sci.*, 102, 11 207–11 212, <https://doi.org/10.1073/pnas.0505191102>, 2005.
- Klein, S. A. and Hartmann, D. L.: The Seasonal Cycle of Low Stratiform Clouds, *J. Clim.*, 6, 1587–1606, [https://doi.org/10.1175/1520-0442\(1993\)006<1587:TSCOLS>2.0.CO;2](https://doi.org/10.1175/1520-0442(1993)006<1587:TSCOLS>2.0.CO;2), 1993.
- 840 Lareau, N. P., Zhang, Y., and Klein, S. A.: Observed Boundary Layer Controls on Shallow Cumulus at the ARM Southern Great Plains Site, *J. Atmos. Sci.*, 75, 2235–2255, <https://doi.org/10.1175/JAS-D-17-0244.1>, 2018.
- Levy, R. C., Mattoo, S., Munchak, L. A., Remer, L. A., Sayer, A. M., Patadia, F., and Hsu, N. C.: The Collection 6 MODIS aerosol products over land and ocean, *Atmos. Meas. Tech.*, 6, 2989–3034, <https://doi.org/10.5194/amt-6-2989-2013>, 2013.



- Li, Z., Zhao, F., Liu, J., Jiang, M., Zhao, C., and Cribb, M.: Opposite effects of absorbing aerosols on the retrievals of cloud optical depth  
845 from spaceborne and ground-based measurements, *J. Geophys. Res. Atmos.*, 119, 5104–5114, <https://doi.org/10.1002/2013JD021053>, 2014.
- Liu, J. and Li, Z.: Significant Underestimation in the Optically Based Estimation of the Aerosol First Indirect Effect Induced by the Aerosol Swelling Effect, *Geophys. Res. Lett.*, 45, 5690–5699, <https://doi.org/10.1029/2018GL077679>, 2018.
- Ma, P.-L., Rasch, P. J., Chepfer, H., Winker, D. M., and Ghan, S. J.: Observational constraint on cloud susceptibility weakened by aerosol  
850 retrieval limitations, *Nat. Commun.*, 9, 2640, <https://doi.org/10.1038/s41467-018-05028-4>, 2018a.
- Ma, X., Yu, F., and Quaas, J.: Reassessment of satellite-based estimate of aerosol climate forcing, *J. Geophys. Res. Atmos.*, 119, 10,394–  
10,409, <https://doi.org/10.1002/2014JD021670>, 2014.
- Ma, X., Jia, H., Yu, F., and Quaas, J.: Opposite Aerosol Index-Cloud Droplet Effective Radius Correlations Over Major Industrial Regions  
and Their Adjacent Oceans, *Geophys. Res. Lett.*, 45, 5771–5778, <https://doi.org/10.1029/2018GL077562>, 2018b.
- 855 Matheson, M. A., Coakley, J. A., and Tahnk, W. R.: Multiyear Advanced Very High Resolution Radiometer observations of summertime strato-  
cumulus collocated with aerosols in the northeastern Atlantic, *J. Geophys. Res.*, 111, D15 206, <https://doi.org/10.1029/2005JD006890>, 2006.
- McComiskey, A. and Feingold, G.: The scale problem in quantifying aerosol indirect effects, 12, 1031–1049, <https://doi.org/10.5194/acp-12-1031-2012>, 2012.
- 860 McComiskey, A., Feingold, G., Frisch, A. S., Turner, D. D., Miller, M. A., Chiu, J. C., Min, Q., and Ogren, J. A.: An assess-  
ment of aerosol-cloud interactions in marine stratus clouds based on surface remote sensing, *J. Geophys. Res.*, 114, D09 203,  
<https://doi.org/10.1029/2008JD011006>, 2009.
- McCoy, D. T., Bender, F. A., Mohrmann, J. K. C., Hartmann, D. L., Wood, R., and Grosvenor, D. P.: The global aerosol-cloud first indirect ef-  
fect estimated using MODIS, MERRA, and AeroCom, *J. Geophys. Res. Atmos.*, 122, 1779–1796, <https://doi.org/10.1002/2016JD026141>,  
865 2017.
- Mülmenstädt, J., Sourdeval, O., Henderson, D. S., L'Ecuyer, T. S., Unglaub, C., Jungandreas, L., Böhm, C., Russell, L. M., and Quaas, J.:  
Using CALIOP to estimate cloud-field base height and its uncertainty: the Cloud Base Altitude Spatial Extrapolator (CBASE) algorithm  
and dataset, *Earth Syst. Sci. Data*, 10, 2279–2293, <https://doi.org/10.5194/essd-10-2279-2018>, 2018.
- Nakajima, T., Higurashi, A., Kawamoto, K., and Penner, J. E.: A possible correlation between satellite-derived cloud and aerosol microphys-  
870 ical parameters, *Geophys. Res. Lett.*, 28, 1171–1174, <https://doi.org/10.1029/2000GL012186>, 2001.
- NASA/LARC/SD/ASDC: MISR Level 2 TOA/Cloud Height and Motion parameters V001, [https://doi.org/10.5067/Terra/MISR/  
MIL2TCSP\\_{\\_}L2.001](https://doi.org/10.5067/Terra/MISR/MIL2TCSP_{_}L2.001), 2012.
- Neubauer, D., Christensen, M. W., Poulsen, C. A., and Lohmann, U.: Unveiling aerosol–cloud interactions – Part 2: Minimising the effects  
of aerosol swelling and wet scavenging in ECHAM6-HAM2 for comparison to satellite data, *Atmos. Chem. Phys.*, 17, 13 165–13 185,  
875 <https://doi.org/10.5194/acp-17-13165-2017>, 2017.
- Painemal, D., Chang, F.-L., Ferrare, R., Burton, S., Li, Z., Smith Jr., W. L., Minnis, P., Feng, Y., and Clayton, M.: Reducing uncertainties in  
satellite estimates of aerosol–cloud interactions over the subtropical ocean by integrating vertically resolved aerosol observations, *Atmos.  
Chem. Phys.*, 20, 7167–7177, <https://doi.org/10.5194/acp-20-7167-2020>, 2020.
- Penner, J. E., Xu, L., and Wang, M.: Satellite methods underestimate indirect climate forcing by aerosols, *Proc. Natl. Acad. Sci.*, 108,  
880 13 404–13 408, <https://doi.org/10.1073/pnas.1018526108>, 2011.

- Pitkänen, M. R. A., Mikkonen, S., Lehtinen, K. E. J., Lipponen, A., and Arola, A.: Artificial bias typically neglected in comparisons of uncertain atmospheric data, *Geophys. Res. Lett.*, 43, 10,003–10,011, <https://doi.org/10.1002/2016GL070852>, 2016.
- Platnick, S., Ackerman, S., King, M. D., Wind, G., Meyer, K., Menzel, P., Frey, R., Holz, R. E., Baum, B., and Yang, P.: MODIS atmosphere L2 cloud product (06\_L2), [https://doi.org/10.5067/MODIS/MOD06\\_L2.061\(Terra\)](https://doi.org/10.5067/MODIS/MOD06_L2.061(Terra)), [https://doi.org/10.5067/MODIS/MYD06\\_L2.061\(Aqua\)](https://doi.org/10.5067/MODIS/MYD06_L2.061(Aqua)), 2017a.
- 885 Platnick, S., King, M. D., and Hubanks, P. A.: MODIS Atmosphere L3 Daily Product, [https://doi.org/10.5067/MODIS/MOD08\\_D3.061\(Terra\)](https://doi.org/10.5067/MODIS/MOD08_D3.061(Terra)), [https://doi.org/10.5067/MODIS/MYD08\\_D3.061\(Aqua\)](https://doi.org/10.5067/MODIS/MYD08_D3.061(Aqua)), 2017b.
- Platnick, S., Meyer, K. G., King, M. D., Wind, G., Amarasinghe, N., Marchant, B., Arnold, G. T., Zhang, Z., Hubanks, P. A., Holz, R. E., Yang, P., Ridgway, W. L., and Riedi, J.: The MODIS Cloud Optical and Microphysical Products: Collection 6 Updates and Examples
- 890 From Terra and Aqua, *IEEE Trans. Geosci. Remote Sens.*, 55, 502–525, <https://doi.org/10.1109/TGRS.2016.2610522>, 2017c.
- Qiu, Y., Zhao, C., Guo, J., and Li, J.: 8-Year ground-based observational analysis about the seasonal variation of the aerosol-cloud droplet effective radius relationship at SGP site, *Atmos. Environ.*, 164, 139–146, <https://doi.org/10.1016/j.atmosenv.2017.06.002>, 2017.
- Quaas, J., Boucher, O., and Lohmann, U.: Constraining the total aerosol indirect effect in the LMDZ and ECHAM4 GCMs using MODIS satellite data, *Atmos. Chem. Phys.*, 6, 947–955, <https://doi.org/10.5194/acp-6-947-2006>, 2006.
- 895 Quaas, J., Boucher, O., Bellouin, N., and Kinne, S.: Satellite-based estimate of the direct and indirect aerosol climate forcing, *J. Geophys. Res. Atmos.*, 113, D05 204, <https://doi.org/10.1029/2007JD008962>, 2008.
- Quaas, J., Stevens, B., Stier, P., and Lohmann, U.: Interpreting the cloud cover – aerosol optical depth relationship found in satellite data using a general circulation model, *Atmos. Chem. Phys.*, 10, 6129–6135, <https://doi.org/10.5194/acp-10-6129-2010>, 2010.
- Quaas, J., Arola, A., Cairns, B., Christensen, M., Deneke, H., Ekman, A. M. L., Feingold, G., Fridlind, A., Gryspeerdt, E., Hasekamp, O., Li,
- 900 Z., Lipponen, A., Ma, P.-L., Mülmenstädt, J., Nenes, A., Penner, J. E., Rosenfeld, D., Schrödner, R., Sinclair, K., Sourdeval, O., Stier, P., Tesche, M., van Diedenhoven, B., and Wendisch, M.: Constraining the Twomey effect from satellite observations: issues and perspectives, *Atmos. Chem. Phys.*, 20, 15 079–15 099, <https://doi.org/10.5194/acp-20-15079-2020>, 2020.
- Randles, C. A., da Silva, A. M., Buchard, V., Colarco, P. R., Darmenov, A., Govindaraju, R., Smirnov, A., Holben, B., Ferrare, R., Hair, J., Shinzuka, Y., and Flynn, C. J.: The MERRA-2 Aerosol Reanalysis, 1980 Onward. Part I: System Description and Data Assimilation
- 905 Evaluation, *J. Clim.*, 30, 6823–6850, <https://doi.org/10.1175/JCLI-D-16-0609.1>, 2017.
- Reutter, P., Su, H., Trentmann, J., Simmel, M., Rose, D., Gunthe, S. S., Wernli, H., Andreae, M. O., and Pöschl, U.: Aerosol- and updraft-limited regimes of cloud droplet formation: influence of particle number, size and hygroscopicity on the activation of cloud condensation nuclei (CCN), *Atmos. Chem. Phys.*, 9, 7067–7080, <https://doi.org/10.5194/acp-9-7067-2009>, 2009.
- Rosenfeld, D., Zhu, Y., Wang, M., Zheng, Y., Goren, T., and Yu, S.: Aerosol-driven droplet concentrations dominate coverage and water of
- 910 oceanic low-level clouds, *Science (80-. )*, 363, <https://doi.org/10.1126/science.aav0566>, 2019.
- Ruehl, C. R., Davies, J. F., and Wilson, K. R.: An interfacial mechanism for cloud droplet formation on organic aerosols, *Science (80-. )*, 351, 1447–1450, <https://doi.org/10.1126/science.aad4889>, 2016.
- Saponaro, G., Kolmonen, P., Sogacheva, L., Rodriguez, E., Virtanen, T., and de Leeuw, G.: Estimates of the aerosol indirect effect over the Baltic Sea region derived from 12 years of MODIS observations, *Atmos. Chem. Phys.*, 17, 3133–3143, <https://doi.org/10.5194/acp-17-3133-2017>, 2017.
- 915 Sassen, K. and Wang, Z.: Classifying clouds around the globe with the CloudSat radar: 1-year of results, *Geophys. Res. Lett.*, 35, L04 805, <https://doi.org/10.1029/2007GL032591>, 2008.

- Schmidt, J., Ansmann, A., Bühl, J., and Wandinger, U.: Strong aerosol–cloud interaction in altocumulus during updraft periods: lidar observations over central Europe, *Atmos. Chem. Phys.*, 15, 10687–10700, <https://doi.org/10.5194/acp-15-10687-2015>, 2015.
- 920 Seinfeld, J. H., Bretherton, C., Carslaw, K. S., Coe, H., DeMott, P. J., Dunlea, E. J., Feingold, G., Ghan, S., Guenther, A. B., Kahn, R., Kraucunas, I., Kreidenweis, S. M., Molina, M. J., Nenes, A., Penner, J. E., Prather, K. A., Ramanathan, V., Ramaswamy, V., Rasch, P. J., Ravishankara, A. R., Rosenfeld, D., Stephens, G., and Wood, R.: Improving our fundamental understanding of the role of aerosol–cloud interactions in the climate system, *Proc. Natl. Acad. Sci.*, 113, 5781–5790, <https://doi.org/10.1073/pnas.1514043113>, 2016.
- 925 Sekiguchi, M., Nakajima, T., Suzuki, K., Kawamoto, K., Higurashi, A., Rosenfeld, D., Sano, I., and Mukai, S.: A study of the direct and indirect effects of aerosols using global satellite data sets of aerosol and cloud parameters, *J. Geophys. Res. Atmos.*, 108, 2002JD003359, <https://doi.org/10.1029/2002JD003359>, 2003.
- Slawinska, J., Grabowski, W. W., Pawlowska, H., and Morrison, H.: Droplet Activation and Mixing in Large-Eddy Simulation of a Shallow Cumulus Field, *J. Atmos. Sci.*, 69, 444–462, <https://doi.org/10.1175/JAS-D-11-054.1>, 2012.
- Smith, C. J., Kramer, R. J., Myhre, G., Alterskjær, K., Collins, W., Sima, A., Boucher, O., Dufresne, J.-L., Nabat, P., Michou, M., Yukimoto, S., Cole, J., Paynter, D., Shiogama, H., O’Connor, F. M., Robertson, E., Wiltshire, A., Andrews, T., Hannay, C., Miller, R., Nazarenko, L., Kirkevåg, A., Olivie, D., Fiedler, S., Lewinschal, A., Mackallah, C., Dix, M., Pincus, R., and Forster, P. M.: Effective radiative forcing and adjustments in CMIP6 models, *Atmos. Chem. Phys.*, 20, 9591–9618, <https://doi.org/10.5194/acp-20-9591-2020>, 2020.
- 930 Sourdeval, O., C.-Labonnote, L., Baran, A. J., Mülmenstädt, J., and Brogniez, G.: A methodology for simultaneous retrieval of ice and liquid water cloud properties. Part 2: Near-global retrievals and evaluation against A-Train products, *Q. J. R. Meteorol. Soc.*, 142, 3063–3081, <https://doi.org/10.1002/qj.2889>, 2016.
- 935 Stier, P.: Limitations of passive remote sensing to constrain global cloud condensation nuclei, *Atmos. Chem. Phys.*, 16, 6595–6607, <https://doi.org/10.5194/acp-16-6595-2016>, 2016.
- Twomey, S.: Pollution and the planetary albedo, *Atmos. Environ.*, 8, 1251–1256, [https://doi.org/10.1016/0004-6981\(74\)90004-3](https://doi.org/10.1016/0004-6981(74)90004-3), 1974.
- Várnai, T. and Marshak, A.: MODIS observations of enhanced clear sky reflectance near clouds, *Geophys. Res. Lett.*, 36, L06807, <https://doi.org/10.1029/2008GL037089>, 2009.
- 940 Várnai, T. and Marshak, A.: Effect of Cloud Fraction on Near-Cloud Aerosol Behavior in the MODIS Atmospheric Correction Ocean Color Product, *Remote Sens.*, 7, 5283–5299, <https://doi.org/10.3390/rs70505283>, 2015.
- Várnai, T. and Marshak, A.: Analysis of Near-Cloud Changes in Atmospheric Aerosols Using Satellite Observations and Global Model Simulations, *Remote Sens.*, 13, 1151, <https://doi.org/10.3390/rs13061151>, 2021.
- 945 Warner, J.: The Microstructure of Cumulus Cloud. Part II. The Effect on Droplet Size Distribution of the Cloud Nucleus Spectrum and Updraft Velocity, *J. Atmos. Sci.*, 26, 1272–1282, [https://doi.org/10.1175/1520-0469\(1969\)026<1272:TMOCCP>2.0.CO;2](https://doi.org/10.1175/1520-0469(1969)026<1272:TMOCCP>2.0.CO;2), 1969.
- Yang, Y., Zhao, C., Wang, Y., Zhao, X., Sun, W., Yang, J., Ma, Z., and Fan, H.: Multi-Source Data Based Investigation of Aerosol–Cloud Interaction Over the North China Plain and North of the Yangtze Plain, *J. Geophys. Res. Atmos.*, 126, <https://doi.org/10.1029/2021JD035609>, 2021.
- 950 Zhang, J., Reid, J. S., and Holben, B. N.: An analysis of potential cloud artifacts in MODIS over ocean aerosol optical thickness products, *Geophys. Res. Lett.*, 32, L15803, <https://doi.org/10.1029/2005GL023254>, 2005.
- Zhang, J., Zhou, X., Goren, T., and Feingold, G.: Albedo susceptibility of northeastern Pacific stratocumulus: the role of covarying meteorological conditions, *Atmos. Chem. Phys.*, 22, 861–880, <https://doi.org/10.5194/acp-22-861-2022>, 2022.
- 955 Zhang, Z. and Platnick, S.: An assessment of differences between cloud effective particle radius retrievals for marine water clouds from three MODIS spectral bands, *J. Geophys. Res.*, 116, D20215, <https://doi.org/10.1029/2011JD016216>, 2011.

- Zhao, C. and Garrett, T. J.: Effects of Arctic haze on surface cloud radiative forcing, *Geophys. Res. Lett.*, 42, 557–564, <https://doi.org/10.1002/2014GL062015>, 2015.
- Zhao, C., Xie, S., Klein, S. A., Protat, A., Shupe, M. D., McFarlane, S. A., Comstock, J. M., Delanoë, J., Deng, M., Dunn, M., Hogan, R. J., Huang, D., Jensen, M. P., Mace, G. G., McCoy, R., O'Connor, E. J., Turner, D. D., and Wang, Z.: Toward understanding of differences in current cloud retrievals of ARM ground-based measurements, *J. Geophys. Res. Atmos.*, 117, D10206, <https://doi.org/10.1029/2011JD016792>, 2012.
- Zhao, C., Zhao, L., and Dong, X.: A Case Study of Stratus Cloud Properties Using In Situ Aircraft Observations over Huanghua, China, *Atmosphere (Basel)*, 10, 19, <https://doi.org/10.3390/atmos10010019>, 2019.
- Zheng, G., Kuang, C., Uin, J., Watson, T., and Wang, J.: Large contribution of organics to condensational growth and formation of cloud condensation nuclei (CCN) in the remote marine boundary layer, *Atmos. Chem. Phys.*, 20, 12 515–12 525, <https://doi.org/10.5194/acp-20-12515-2020>, 2020.
- Zheng, Y.: Theoretical Understanding of the Linear Relationship between Convective Updrafts and Cloud-Base Height for Shallow Cumulus Clouds. Part I: Maritime Conditions, *J. Atmos. Sci.*, 76, 2539–2558, <https://doi.org/10.1175/JAS-D-18-0323.1>, 2019.
- Zheng, Y. and Rosenfeld, D.: Linear relation between convective cloud base height and updrafts and application to satellite retrievals, *Geophys. Res. Lett.*, 42, 6485–6491, <https://doi.org/10.1002/2015GL064809>, 2015.
- Zheng, Y., Rosenfeld, D., and Li, Z.: Quantifying cloud base updraft speeds of marine stratocumulus from cloud top radiative cooling, *Geophys. Res. Lett.*, 43, <https://doi.org/10.1002/2016GL071185>, 2016.
- Zhu, Y., Rosenfeld, D., and Li, Z.: Under What Conditions Can We Trust Retrieved Cloud Drop Concentrations in Broken Marine Stratocumulus?, *J. Geophys. Res. Atmos.*, 123, 8754–8767, <https://doi.org/10.1029/2017JD028083>, 2018.

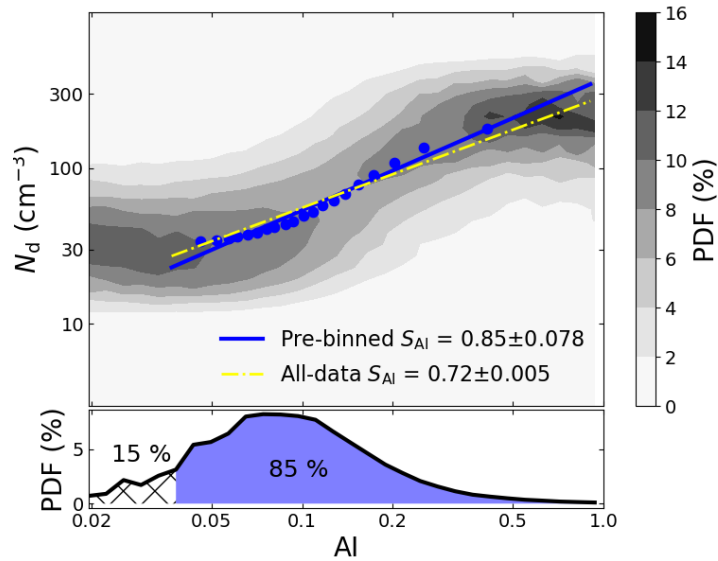

**Figure 1.** Schematic diagram of the procedure for calculating the sensitivity (linear regression coefficient in log–log space) of  $N_d$ -to-CCN, where AI is taken as a example. Upper panel shows the global joint  $N_d$ -AI histogram, where each column is normalized so that it sums to 1. The blue line is a linear regression on the 20 paired  $N_d$ -AI (blue dots) that are the medians of each AI bin with an equal number of samples, and the white-yellow dashed line shows a linear regression on all data points. Note that the lowest 15 % AI have been left out according to its occurrence (bottom) before binning data. The cloud susceptibilities to AI ( $S_{AI}$ ) derived from both approaches are shown along with 95 % uncertainty estimates (according to Student’s t-test). Data used here are the same as in section 3.1.

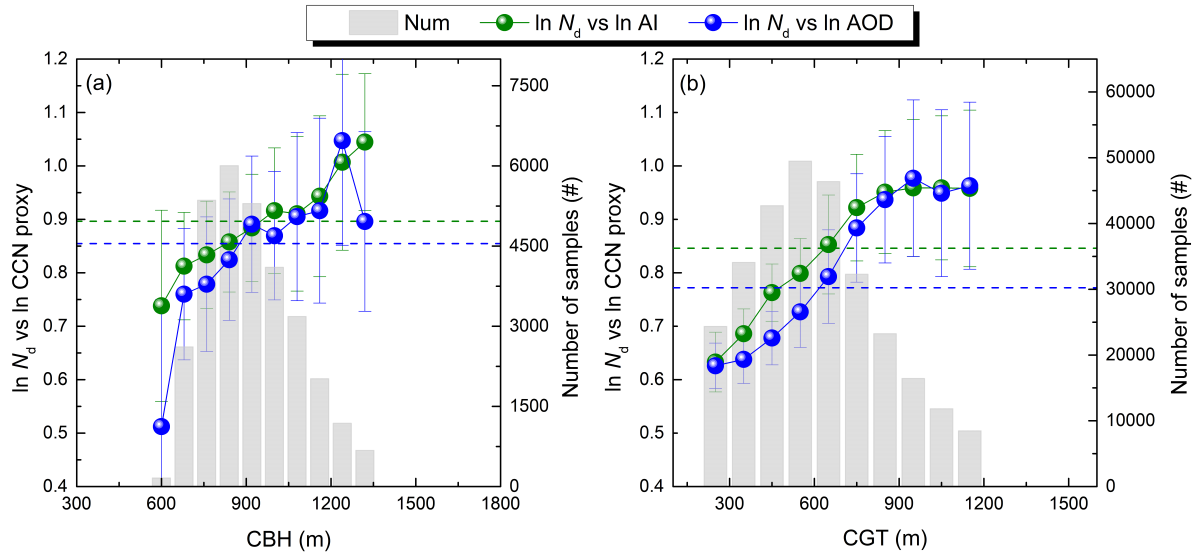

**Figure 2.** Dependence of the linear regression slopes of  $\ln N_d$  versus  $\ln AOD$  (blue) and  $\ln AI$  (green) on (a) CBH and (b) CGT derived via the pre-binned approach. Data are taken over the global ocean ( $60^\circ S - 60^\circ N$ ), and then grouped into 10 fixed CBH (CGT) intervals for regressions. Error bars indicate the 95 % confidence interval of the linear regression, and the gray bars denote the total number of samples for each CBH (CGT) bin. The corresponding regression slopes computed from the data over all CBH (CGT) bins are shown as horizontal dashed lines (green for AI and blue for AOD). The gray bars denote equivalent Fig. S1 shows similar results based on the total number of samples for each CBH (CGT) bin all-data approach.

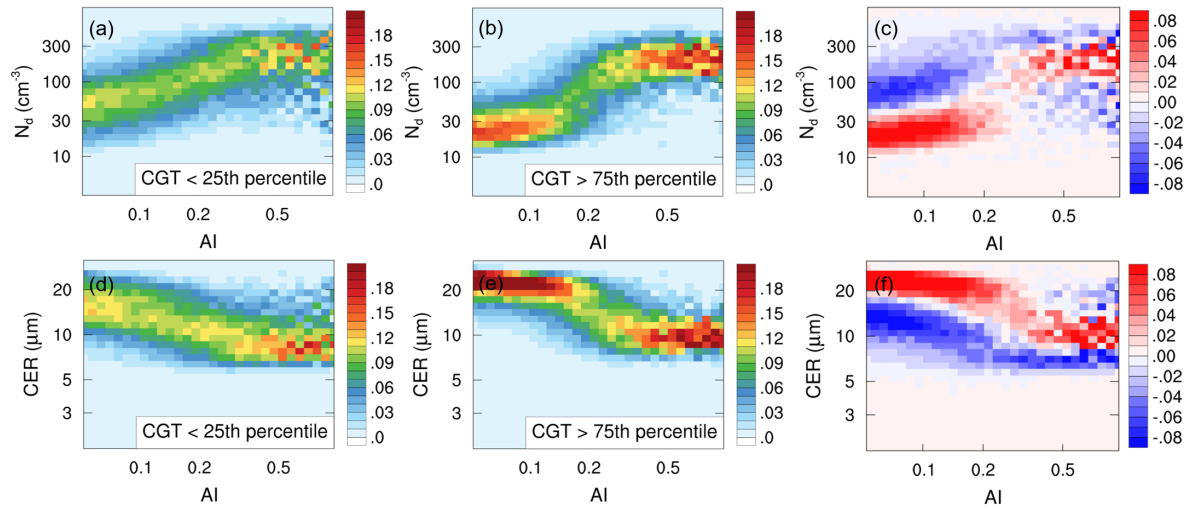

**Figure 3.** Joint histograms between AI and  $N_d$  (CER) created for weak and strong updraft conditions, as defined by the lowest and the highest  $\text{EBH}(\text{CGT})$  quartiles, respectively. The difference plots between strong and weak cases are shown at the end of each row. The histograms are normalized so each column sums to 1, such that the histograms show the probability of observing a specific  $N_d$  (CER), given a certain AI.

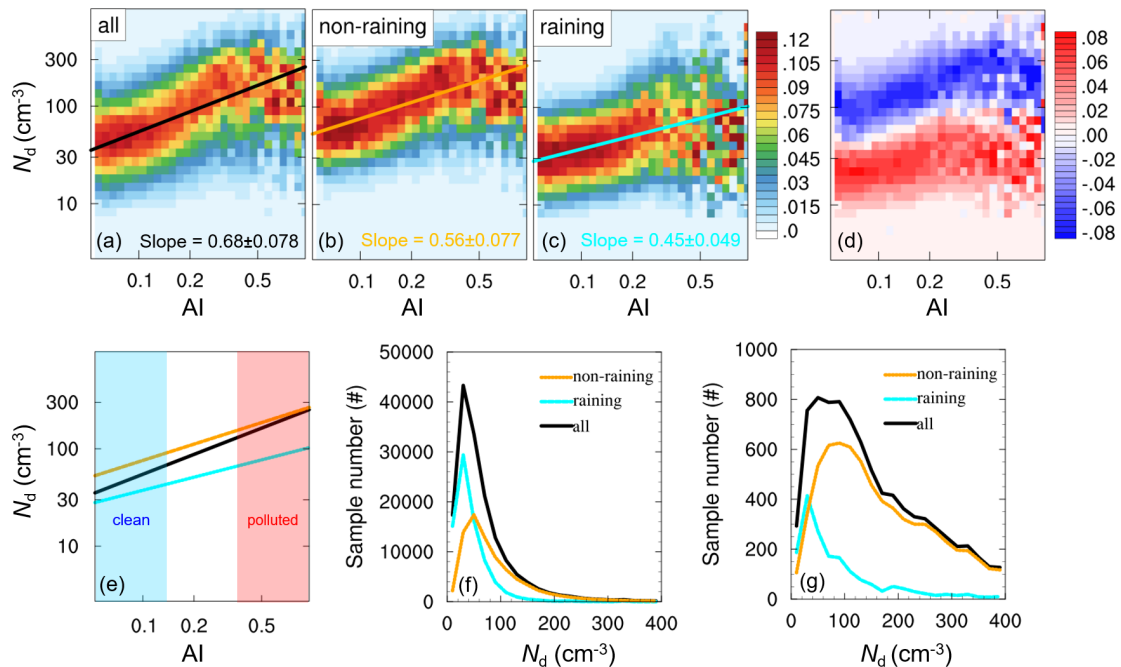

**Figure 4.** Joint histograms between AI and  $N_d$  created for (a) all clouds, (b) non-raining, and (c) raining clouds, as well as (d) the difference of joint histograms between the raining and non-raining cases. [Cloud susceptibilities to AI derived via the pre-binned approach are also shown along with 95 % uncertainty estimates \(according to Student's t-test\).](#) The fitting lines for three cases are merged into one single plot (e), with clean and polluted zones marked as blue and red, and the corresponding sample distributions are also shown (f, g).



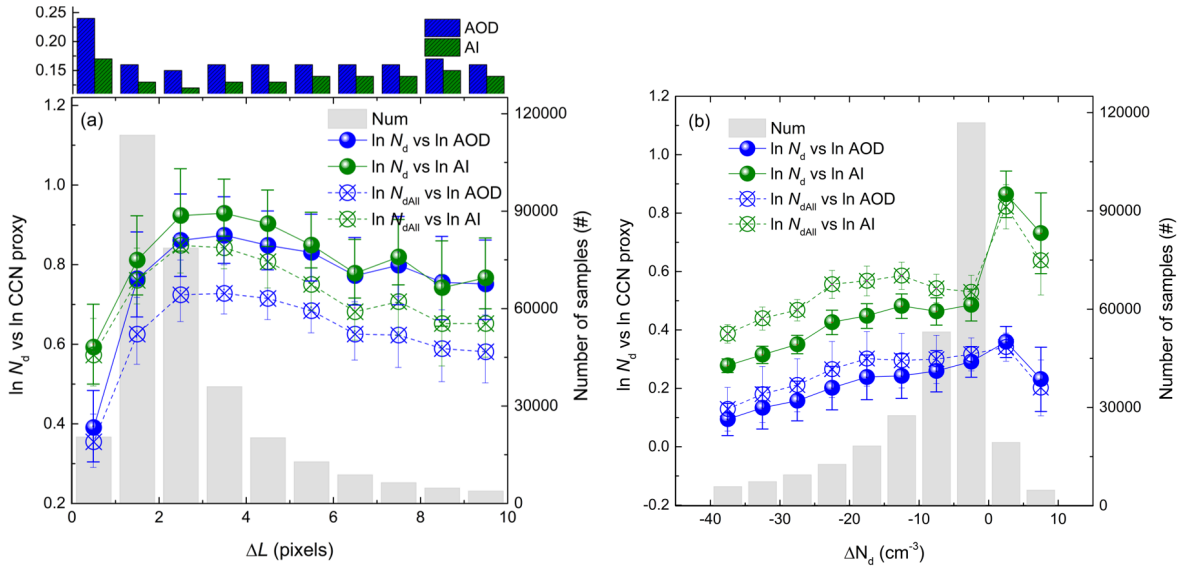

**Figure 5.** Dependence of the linear regression slopes of  $\ln N_d$  ( $\ln N_{dAll}$ ) versus  $\ln$  AOD ( $\ln$  AI) on (a)  $\Delta L$  and (b)  $\Delta N_d$  derived via the pre-binned approach. Data are grouped into 10 fixed  $\Delta L$  ( $\Delta N_d$ ) intervals for the calculation of slopes. The Error bars indicate the 95 % confidence interval of the linear regression, and the gray bars denote the total number of samples for each bins denoted as gray bar. The change of AOD (AI) with  $\Delta L$  is also shown in the panel (a). The equivalent Fig. S3 shows similar results based on the all-data approach.

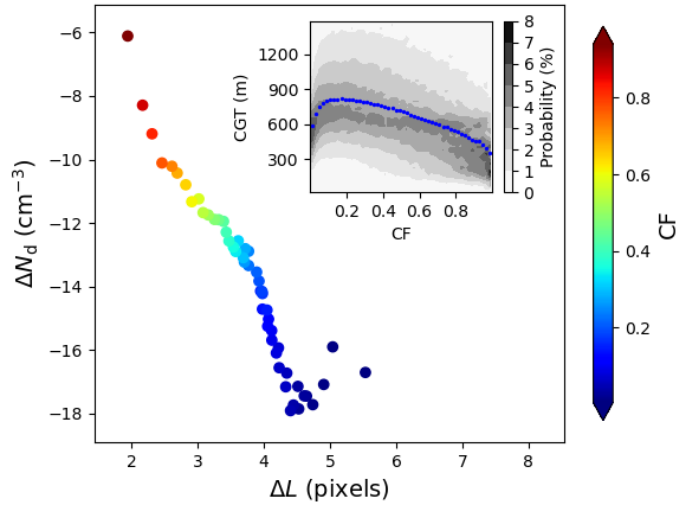

**Figure 6.** Relationships between  $\Delta L$  and  $\Delta N_d$ , where the data are grouped as a function of CF with each CF bin containing same number of samples. Variation of CGT with Joint histogram between CF and CGT is shown in the inner plot, where the CGT and CF are blue dot shows the medians of all values in median CGT at each CF bin.

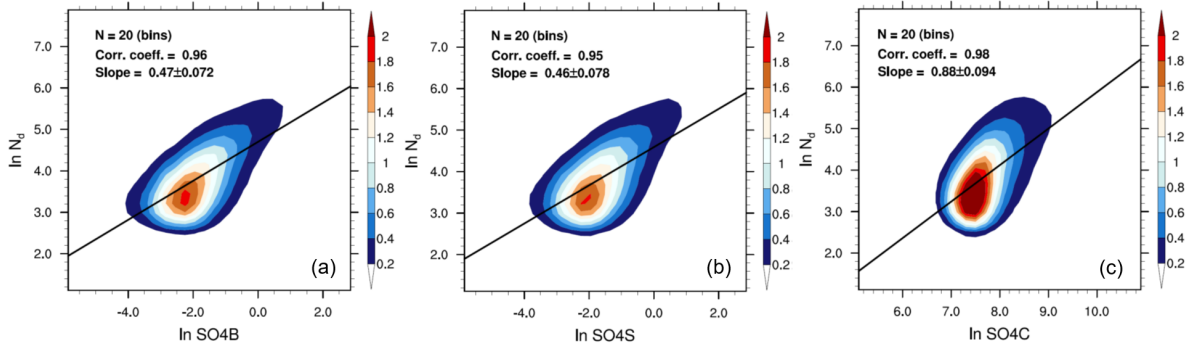

**Figure 7.** Two-dimensional probability density functions of  $\ln(N_d)$  versus (a)  $\ln(\text{SO4B})$ , (b)  $\ln(\text{SO4S})$ , and (c)  $\ln(\text{SO4C})$ , respectively, for the period 2006-2009. Regression results and corresponding statistics (sample numbers and  $N$ ), correlation coefficients, and regression slopes with 95 % uncertainty estimates (according to Student's t-test) for pre-binned  $\text{SO4}-N_d$  pairs are displayed in the upper left of each plot.

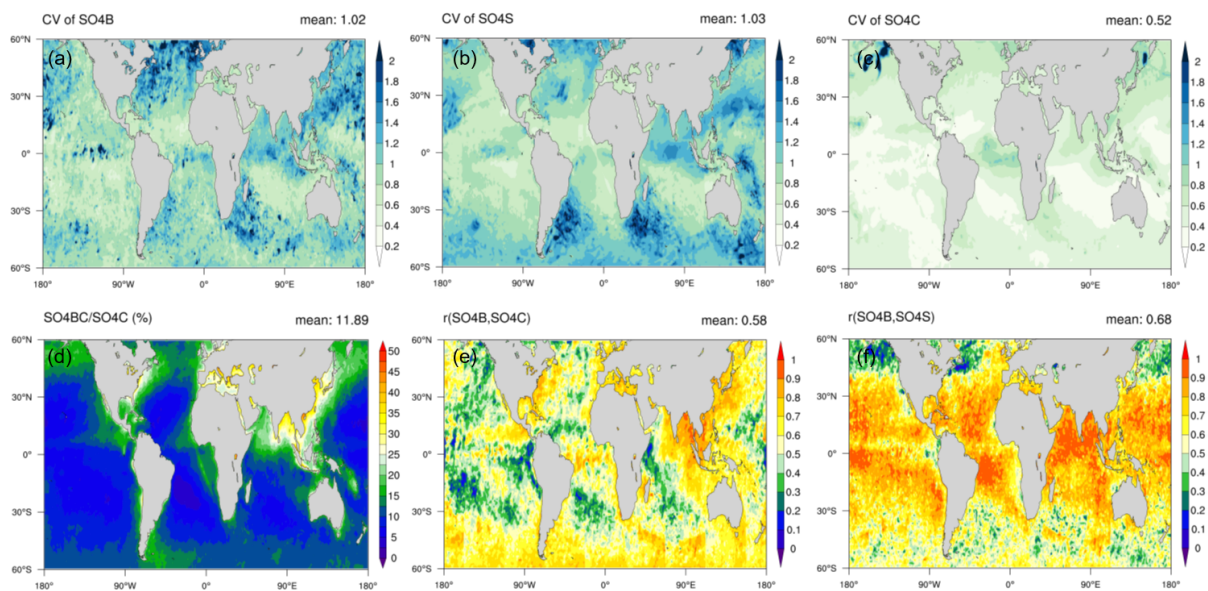

**Figure 8.** Map of coefficients of variations (CV) of (a) SO<sub>4</sub>B, (b) SO<sub>4</sub>S, and (c) SO<sub>4</sub>C, (d) ratio of column mass of SO<sub>4</sub> below clouds (SO<sub>4</sub>BC) to SO<sub>4</sub>C (%), Pearson's correlation coefficients of SO<sub>4</sub>B with (e) SO<sub>4</sub>C and (f) SO<sub>4</sub>S, which are calculated for each 1°×1° grid box over the period 2006–2009.

**Table 1.** The list of the parameters, sources, and their corresponding temporal-spatial resolutions applied in present study.

| Source               | Time period                                                | Resolution                                                               | Parameters                                                                                                                                                                                                                                                                                          |
|----------------------|------------------------------------------------------------|--------------------------------------------------------------------------|-----------------------------------------------------------------------------------------------------------------------------------------------------------------------------------------------------------------------------------------------------------------------------------------------------|
| MYD08/MOD08          | Jan 2008–Dec 2008 for MYD08<br>Jan 2006–Dec 2009 for MOD08 | Daily, $1^\circ \times 1^\circ$                                          | AOD at 460/550/660 nm <sup>a</sup><br>Distance to nearest cloudy pixel ( $\Delta L$ )<br>CF                                                                                                                                                                                                         |
| MYD06/MOD06          | Jan 2008–Dec 2008 for MYD06<br>Jan 2006–Dec 2009 for MOD06 | Daily, $1 \times 1 \text{ km}^2$<br><br>Daily, $5 \times 5 \text{ km}^2$ | COT at $3.7 \mu\text{m}$<br>CER at $3.7 \mu\text{m}$<br>Cloud_Mask_SPI<br>Cloud <a href="#">top temperature</a><br><a href="#">Cloud</a> multi-layer flag<br>Cloud phase flag<br>CF <sub>5x5km<sup>2</sup></sub><br><a href="#">Cloud top temperature</a> Solar zenith angle<br>Sensor zenith angle |
| CloudSat             | Jan 2008–Dec 2008                                          | Daily, $1.4 \times 2.5 \text{ km}^2$                                     | Precipitation flag                                                                                                                                                                                                                                                                                  |
| MISR                 | Jan 2006–Dec 2009                                          | Daily, $0.25^\circ \times 0.25^\circ$                                    | CBH<br>CTH                                                                                                                                                                                                                                                                                          |
| MERRA-2              | Jan 2006–Dec 2009                                          | 3-hourly, $0.5^\circ \times 0.625^\circ$                                 | Sulfate mass mixing ratio profile<br>Air density                                                                                                                                                                                                                                                    |
| <a href="#">ERA5</a> | <a href="#">Jan 2006–Dec 2009</a>                          | <a href="#">hourly, <math>0.25^\circ \times 0.25^\circ</math></a>        | <a href="#">Temperatures at 700 and 1000 hPa</a>                                                                                                                                                                                                                                                    |

**Table 2.** [The combination of datasets used in each subsection of the Results section.](#)

| <a href="#">Subsection</a>  | <a href="#">Datasets</a>                 |
|-----------------------------|------------------------------------------|
| <a href="#">Section 3.1</a> | <a href="#">MOD08, MOD06, MISR, ERA5</a> |
| <a href="#">Section 3.2</a> | <a href="#">MYD08, MYD06, CloudSat</a>   |
| <a href="#">Section 3.3</a> | <a href="#">MOD08, MOD06, MISR</a>       |
| <a href="#">Section 3.4</a> | <a href="#">MERRA-2, MOD06, MISR</a>     |

**Table 3.** Issues highlighted in this study and their impacts on the overall estimation of  $S$ .

| Process not considered                         | Impact on $S$  |
|------------------------------------------------|----------------|
| Updraft dependency                             | To be assessed |
| Precipitation                                  | Biased high    |
| Retrieval biases                               | Biased low     |
| Vertical co-location between aerosol and cloud | Biased high    |
